1 Title:

2 Quantification of miscarriage sex bias in England and Wales, 1993-2017

3

4 Running title:

5 Miscarriage sex bias

6

7 Author:

8 John F Mulley<sup>1</sup>

9

10 Affiliation:

11 1. School of Natural Sciences, Bangor University, Deiniol Road, Bangor, LL57 2UW, United Kingdom

12

13 To whom correspondence should be addressed: [j.mulley@bangor.ac.uk](mailto:j.mulley@bangor.ac.uk)

14

15

16

17 Keywords: Miscarriage; sex ratio; sex bias; abortion; conception; pregnancy; stillbirth

18

19

20

21

22

23

24

25

26

27

28

29

30 **Abstract:**

31 **Study question:**

32 How extensive is miscarriage sex bias?

33 **Summary answer:**

34 Girls are more susceptible to miscarriage, with 941-986 males miscarried per 1,000 females in England and  
35 Wales between 1993-2017.

36 **What is known already:** The human sex ratio at birth is skewed towards males, with on average 1,053 boys  
37 born for every 1,000 girls in England and Wales between 1993 and 2017. Stillbirth also shows a male bias,  
38 averaging 1,112 boys lost per 1,000 girls over the same period. If the sex ratio at conception is equal, and  
39 more boys are lost to stillbirth, then more girls must be lost during pregnancy.

40 **Study design, size, duration:**

41 Here I use data on live births, stillbirths and legal therapeutic and elective abortions in England and Wales  
42 from 1993-2017 to determine relevant annual numbers of conceptions if 10%, 20%, 25% or 33% of  
43 conceptions result in miscarriage.

44 **Participants/materials, setting, methods:**

45 Subtracting known numbers of boys and girls in live births and stillbirths from the predicted conceptions,  
46 and predicting sex ratios of aborted fetuses, allows calculation of the sex ratio of miscarried products of  
47 conception.

48 **Main results and the role of chance:**

49 There were 23,616,601 to 31,723,793 conceptions in England and Wales between 1993-2017, resulting in  
50 16,656,203 live births (8,114,739 female and 8,541,464 male); 86,714 stillbirths (41,059 female and 45,655  
51 male); and 4,512,024 legal abortions. There were 2,361,660 to 10,468,852 miscarriages, averaging between  
52 94,466 per year (941 males per 1,000 females) if 10% of all conceptions result in miscarriage to 418,754 per  
53 year (986 males per 1,000 females) for a miscarriage risk of 33%. more girls were aborted than boys, more  
54 boys were born live and stillborn, and significantly more girls were miscarried ( $P < 0.00001$ , Pearson's  $\chi^2$   
55 test)

56 **Limitations, reasons for caution:**

57 The abortus sex ratio was determined on the assumption that early ( $\leq 12$  weeks) abortions are biased towards  
58 females (55:45) and later abortions ( $\geq 13$  weeks) are biased towards males (45:55). If the abortus sex ratio is

59 balanced, the miscarriage sex bias is exacerbated, with between 691-921 males lost per 1,000 females. The  
60 miscarriage rate is also currently unclear, but my predictions of the number of missing conceptions suggests  
61 that the values used here are not unreasonable.

62 **Wider implications of the findings:**

63 Girls are more susceptible to miscarriage than boys, and there is a greater loss of girls throughout pregnancy.  
64 This study quantifies the extent of this miscarriage sex bias, and provides a starting point for understanding  
65 why this bias exists, how and when it varies, and when it is established during pregnancy. In the absence of  
66 evidence to support a male-biased primary sex ratio, it seems likely that the greater loss of girls is the result  
67 of parental conflict and imprinting, perhaps because of a trade-off between an elevated risk of early loss of  
68 female embryos versus a greater robustness of survivors, as evidenced by the greater number of boys that are  
69 stillborn, and the higher infant mortality rate of boys.

70 **Study funding/competing interest(s):**

71 None to declare.

72 **Trial registration number:**

73 Not applicable.

74

75

76

77

78

79

80

81

82

83

84

85

86

87

88

89

90 **Background:**

91 Males and females differ from the very point of conception, with females having two X chromosomes, and  
92 males one X and one Y. Only males can express genes on the Y chromosome, and, prior to the completion of  
93 X chromosome inactivation, females can produce up to twice the amount of gene product for any gene  
94 encoded by the X chromosome. These differences are evident not only in the metabolism of early male and  
95 female embryos<sup>1-4</sup>, but also in differential survival throughout gestation. The human sex ratio at birth is  
96 consistently biased towards boys, and remarkably stable (Figure 1), with on average 1,053 boys born for  
97 every 1,000 girls in England and Wales between 1927 and 2017. Indeed, the slight bias towards boys at birth  
98 is so stable that deviations are indicative of sex-specific abortions<sup>5</sup>. This bias at birth is consistent, even  
99 though boys are more susceptible to stillbirth<sup>6</sup>, with on average 1,127 boys lost per 1,000 girls between 1927  
100 and 2017, and only three years between 1927 and 2017 where more girls were stillborn (1974, 1975 and  
101 2016 (Figure 1)). More generally, the human sex ratio fluctuates from conception to birth, with a greater loss  
102 of males in the first few weeks, followed by a greater loss of females in the first trimester, and a general male  
103 bias from around week 20 onwards<sup>7</sup>, although these fluctuations are generally minor, and the overall sex  
104 ratio never deviates by more than a few percent. Historically, the male bias at birth was taken to result from  
105 the production of a greater proportion of males at conception (the primary sex ratio), although more recent  
106 data from *in vitro* fertilisation supports a balanced PSR in humans (see Orzack et al.<sup>7</sup> for discussion), as does  
107 the simple mechanics of equal segregation of X and Y chromosomes during spermatogenesis. If the sex ratio  
108 at fertilisation is equal, then there must be an overall greater loss of girls during gestation<sup>8</sup>, but how many?  
109 And is the spontaneous abortion (hereafter referred to as ‘miscarriage’) sex ratio stable, or does it fluctuate?  
110 It is well established that adverse events such as terrorist attacks impact the sex ratio at birth, with a decrease  
111 in the number of boys<sup>9,10</sup>, and so we should expect that this will be reflected in the miscarriage sex ratio.  
112 Whilst 10% of clinically-recognised pregnancies end in miscarriage, the true number is estimated to be much  
113 higher as many pregnancies are lost before they are identified, and up to one third of all pregnancies may end  
114 in miscarriage<sup>11-15</sup>. Determining the sex of miscarried products of conception has typically been complicated  
115 by the necessity to collect foetal tissue and identify sex chromosomes, where contamination by maternal  
116 tissues could lead to an overestimation of the number of miscarried girls<sup>16</sup>.

117 In England and Wales, all births and stillbirths must be registered, and there is extensive historical data  
118 available on numbers of live births and stillbirths, including sex ratios (it should be noted however that in

119 October 1992, the Stillbirth (Definition) Act 1992 changed the gestation cut-off for stillbirths from 28 or  
120 more weeks of gestation to 24 or more weeks, and so data from 1993 onwards is not comparable to previous  
121 years – this study therefore focuses on data from 1993 to the most recent relevant releases (2017)). In  
122 addition to extensive live birth and stillbirth data, the requirement that all practitioners in England and Wales  
123 who perform therapeutic or elective abortions must notify the Chief Medical Officer means that abortion  
124 statistics (including number of abortions by gestation week) are available going back to the late 1960's. The  
125 stability of the overall sex ratio at birth (Figure 1) suggests that, in England and Wales at least, there is no  
126 sex-selective abortion, and the general increase in the number of legal abortions, and the lack of maternal  
127 deaths due to complications of illegal abortions<sup>17</sup> also suggests that there are few if any unrecorded abortions  
128 in England and Wales. If the human sex ratio is female-biased until around week 12, and male-biased  
129 subsequently<sup>7</sup>, then we can calculate the proportion of males and females that are legally aborted each year  
130 and so determine the total number of pregnancies (here defined as a conception resulting in a live birth,  
131 stillbirth, or abortion). Using predicted values for the number of conceptions that resulted in miscarriage, it is  
132 then possible to calculate the total number of conceptions, and, from that, the miscarriage sex ratio.  
133 Here, I use a 25 year dataset from 1993 to 2017, comprising 16,656,203 live births, 86,714 stillbirths, and  
134 4,512,654 legal abortions to calculate the miscarriage sex ratio for 23,616,601 to 31,723,793 predicted  
135 conceptions and so demonstrate the extent and variability of any miscarriage sex bias.

136

### 137 **Methods:**

138 Data for numbers of maternities, live births and stillbirths, including numbers of males and females, were  
139 collected from the Office for National Statistics (<https://www.ons.gov.uk/>) 'Review of the Registrar General  
140 on births and patterns of family building in England and Wales', Series FM1 (numbers 22-37, covering  
141 1993-2008), the 'Characteristics of Birth 2, England and Wales' dataset (2009-2013), the 'Birth  
142 characteristics dataset' (2014-2016), and the 'Summary of key birth statistics, 1838 to 2017'. Data on  
143 numbers of legal abortions from 2011-2017 were obtained from the Department of Health and Social Care  
144 (DHSC) 'Abortion statistics, England and Wales' collection  
145 (<https://www.gov.uk/government/collections/abortion-statistics-for-england-and-wales>), and for 1993-2010  
146 from the UK Government Web Archive (<http://www.nationalarchives.gov.uk/webarchive/>). Numbers of  
147 stillbirths by age of mother for 2012 were obtained from the from the 'Child Mortality Statistics 2012'

148 dataset

149 ([https://www.ons.gov.uk/peoplepopulationandcommunity/birthsdeathsandmarriages/deaths/datasets/childmor](https://www.ons.gov.uk/peoplepopulationandcommunity/birthsdeathsandmarriages/deaths/datasets/childmortalitystatisticschildhoodinfantandperinatalchildhoodinfantandperinatalmortalityinenglandandwales)  
150 [talitystatisticschildhoodinfantandperinatalchildhoodinfantandperinatalmortalityinenglandandwales](https://www.ons.gov.uk/peoplepopulationandcommunity/birthsdeathsandmarriages/deaths/datasets/childmortalitystatisticschildhoodinfantandperinatalchildhoodinfantandperinatalmortalityinenglandandwales)), and

151 England and Wales population data were obtained from the ‘MYE2: Population Estimates by single year of  
152 age and sex for local authorities in the UK, mid-2012’

153 ([https://www.ons.gov.uk/peoplepopulationandcommunity/populationandmigration/populationestimates/datas](https://www.ons.gov.uk/peoplepopulationandcommunity/populationandmigration/populationestimates/datasets/populationestimatesforukenglandandwalesscotlandandnorthernireland)  
154 [ets/populationestimatesforukenglandandwalesscotlandandnorthernireland](https://www.ons.gov.uk/peoplepopulationandcommunity/populationandmigration/populationestimates/datasets/populationestimatesforukenglandandwalesscotlandandnorthernireland)).

155 Gestation week data is variable across the abortion dataset, and so statistics were pooled into abortions  
156 occurring either  $\leq 12$  weeks or  $\geq 13$  weeks. A comprehensive study of the human sex ratio from conception to  
157 birth<sup>7</sup> supports a female-biased cohort sex ratio during early pregnancy based on chorionic villus sampling,  
158 amniocentesis and induced abortions, and I have therefore chosen a conservative estimate of a 55:45  
159 female:male sex ratio  $\leq 12$  weeks and 45:55 female:male  $\geq 13$  weeks. Using these values, I calculated the  
160 number of male and female abortuses each year. For comparison, abortus sex was also calculated on the  
161 assumption that the abortus sex ratio is equal (50:50).

162 Adding together the total number of live births, stillbirths and legal abortions provided the number of  
163 pregnancies, and accepting that these represent 90%, 80%, 75% or 67% of actual conceptions (i.e. the  
164 probability that a conception resulted in miscarriage was 10%, 20%, 25% or 33%) determined the relevant  
165 number of conceptions. If the primary sex ratio is equal, then equal numbers of males and females are  
166 conceived, and subtraction of the known numbers of live and stillborn males and females, and the predicted  
167 male and female abortuses left the number of products of conception lost to miscarriage.

168 Statistical significance of deviation of calculated numbers of miscarried males and females from expected  
169 numbers (males and females are equally susceptible to miscarriage) was assessed using Pearson’s  $\chi^2$  test. All  
170 calculations were rounded to the nearest whole number to reflect the impossibility of conceiving a fraction of  
171 a person, and so in some cases annual totals are not the sum of their constituent parts. It also goes without  
172 saying that the ratios presented here address only a narrow range of biological sex, not gender, and are  
173 predicated on the simplistic assumption that XX = female and XY = male.

174

175 **Results:**

176 In England and Wales between 1993 and 2017 there were 16,489,289 maternities (a pregnancy resulting in  
177 the birth of one or more children including stillbirths, of which around 1.5% resulted in multiple births);  
178 16,656,203 live births (8,114,739 female and 8,541,464 male, with on average 1,053 males born per 1,000  
179 females); 86,714 stillbirths (41,059 female and 45,655 male, with on average 1,112 males stillborn per 1,000  
180 females); 4,512,024 legal abortions, and between 23,616,601 to 31,723,793 conceptions (Supplemental table  
181 S1). Of the 4,512,024 abortions, 4,044,380 occurred  $\leq 12$  weeks of gestation and 467,644 occurred  $\geq 13$   
182 weeks, with 2,435,740 girls aborted to 2,076,284 boys, for an average of 853 boys aborted per 1,000 girls  
183 (Figure 2, Table 1). There were 2,361,660 – 10,468,852 miscarriages in the years 1993-2017, averaging  
184 between 94,466 per year (941 males per 1,000 females) if 10% of all conceptions result in miscarriage to  
185 418,754 per year (986 males per 1,000 females) for a miscarriage risk of 33% (Table 2). From this 25 year  
186 dataset for England and Wales, more girls were aborted than boys, more boys were born live and stillborn,  
187 and significantly more girls were miscarried ( $P < 0.00001$ , Pearson's  $\chi^2$  test, Figure 3).

188

## 189 **Discussion:**

190 Miscarriage affects around 10% of clinically-recognised pregnancies, and a far higher number of  
191 unrecognised ones. If we are to reduce or remove the prevalence of this emotionally-damaging pregnancy  
192 outcome, we must understand the factors that influence pregnancy retention or loss. The bias towards males  
193 in the human sex ratio at birth has long hinted at a greater loss of females during pregnancy, but the problems  
194 inherent in obtaining and interpreting tissue samples from miscarried products of conception has made  
195 estimation of the role played by fetal sex in pregnancy outcome almost impossible. Using population-level  
196 data on births and abortions, I show that the male bias in the human sex ratio at birth is the result of a greater  
197 loss of females to miscarriage during pregnancy and quantify the number of males and females lost over a 25  
198 year period in England and Wales. More females than males are also aborted, largely as a result of a greater  
199 number of abortions occurring  $\leq 12$  weeks of gestation when the sex ratio is skewed towards females. There  
200 is no evidence that the greater proportion of aborted females is the result of sex-specific abortion. If the  
201 female abortion bias is removed (i.e. the abortus sex ratio is equal, irrespective of when the abortion  
202 occurred) then the female bias in miscarriage is exacerbated, with between 691-921 males lost per 1,000  
203 females (Supplemental tables S2, and S3, Supplemental Figure S1). Why might females be more susceptible  
204 to loss than males?

205 It is typically suggested that early loss of female embryos (particularly in recurrent miscarriage) is the result  
206 of problems related to X chromosome inactivation, and especially skewed or highly skewed inactivation,  
207 where either the maternal or paternal copy is preferentially inactivated<sup>18-24</sup>. However, results in this area are  
208 contradictory<sup>25-28</sup>, and it is unclear how applicable this phenomenon is to miscarriage more generally. An  
209 alternative explanation might lie in imprinting and parental conflict. If pregnancy is viewed as a conflict  
210 between mother and offspring, rather than a cooperative process, then the selective pressure on maternal  
211 genes will be to limit the supply of resources to the developing offspring so as to maximise (or at least  
212 stabilise) maternal fitness, whereas fetal genes will be selected to maximise growth<sup>29,30</sup>. Imprinting therefore  
213 serves to limit the growth and/or function of the placenta. There is also conflict between maternal and  
214 paternal alleles, as fathers have an interest in improved survival of current offspring, even at the expense of  
215 future offspring, which may have a different father. Imprinted paternal alleles may therefore have a stronger  
216 effect, as fathers have fewer opportunities to influence maternal investment<sup>31,32</sup>. X-linked alleles can only be  
217 imprinted in females, as males never inherit a paternal X chromosome, and inheritance of paternally  
218 imprinted X chromosomes retards fetal growth in mice<sup>33</sup>. Iwasa et al.<sup>34</sup> proposed a “reverse imprinting”  
219 model, where expression of maternal alleles might be favoured if elevated expression of a gene increases the  
220 possibility of spontaneous abortion, but leads to an increase in robustness (increased growth and pre- and  
221 post-natal survival) of embryos that pass this stage. If losses occur early in pregnancy, minimal resources  
222 have been invested and so the cost to the mother is limited. Boys exhibit greater infant mortality than girls<sup>35</sup>  
223 (and higher stillbirth rates, see above) and so it may be that the greater loss of girls earlier in pregnancy  
224 actually explains their later robustness.

225 Interestingly, only a relatively minor change in primary sex ratio to produce between 49.85% and 49.89%  
226 females rather than 50% is sufficient to remove the miscarriage sex bias, even with the greater number of  
227 females aborted (Supplemental table S4). If the abortus sex ratio is equal, the primary sex ratio must produce  
228 between 49.09% to 49.32% females to remove the miscarriage sex bias (Supplemental table S5). It is worth  
229 briefly considering how such a biased primary sex ratio might be produced. Right and left ovaries are not  
230 symmetrical, and differ with respect to anatomical relations and venous drainage, with the left ovary drained  
231 by the left renal vein, and the right drained by the inferior vena cava. The higher venous pressure in the left  
232 renal vein results in slower drainage, and so hormones produced by the left ovary during ovulation will  
233 remain in this side for longer than in the right. This asymmetry may impact frequency and pattern of



234 ovulation, and reproductive potential of oocytes from left and right ovaries, where the right ovary may be  
235 more productive<sup>36-40</sup>. Ovarian asymmetry is known from a number of other species, such as birds, which  
236 develop only one ovary<sup>41,42</sup>, mice, where the right ovary is more productive than the left<sup>43</sup>, certain species of  
237 bat<sup>44</sup>, as well as shrews<sup>45</sup>, hamsters, and waterbuck<sup>46,47</sup>. Perhaps the best evidence for a role for ovarian  
238 asymmetry in manipulation of sex ratios comes from the Mongolian gerbil (*Meriones unguiculatus*), where  
239 male embryos are more common in the right uterine horn, and females more common in the left<sup>48</sup>. When the  
240 left and right , ovaries are switched, the sex ratio follows the ovary, and when the right ovary is cut in half  
241 and placed in both positions more males are produced from both uterine horns<sup>49</sup>. A similar situation has been  
242 identified in cows<sup>50</sup>, although that may be complicated by movement of embryos between uterine horns.  
243 Parental hormones influence offspring sex ratios<sup>51-55</sup>, and levels of testosterone in follicular fluid during  
244 oocyte maturation may determine whether an egg is fertilised by X or Y chromosome-bearing sperm<sup>56,57</sup>.  
245 This influence of parental hormones on offspring sex ratios in humans is perhaps most clearly indicated by  
246 the alteration to the secondary (birth) sex ratio following violent events such as terrorist attacks<sup>9,10</sup>, evident  
247 here as a decline in the miscarriage sex bias around 2005 and 2006, following the 7<sup>th</sup> July 2005 terrorist  
248 attacks in London (Figure 3). Whilst glucose can influence embryo survival, and seems to adversely impact  
249 females<sup>2,4,58</sup>, it seems most likely that hormonal variations, resulting from an inherent ovarian asymmetry  
250 (established during embryonic development of the adrenogonadal primordia from the genital ridges under the  
251 influence of an earlier PITX2-derived asymmetry<sup>41</sup>), would control either sperm chemoattraction<sup>59-62</sup> (or  
252 repulsion<sup>63</sup>), or preferential fertilisation by X and Y chromosome-bearing sperm. However, in the absence of  
253 evidence in support of the above, and given unbiased segregation of sex chromosomes during sperm  
254 formation, a primary sex ratio of 50:50 can safely be assumed, and miscarriage sex bias is real.  
255 My analysis represents the first attempt to theoretically determine both the sex ratio of abortuses, and the sex  
256 ratio of miscarried products of conception. Obviously, there is a disconnect between year of birth, stillbirth  
257 or abortion and year of conception, and certain assumptions had to be made, such as the number of aborted  
258 males and females (55:45 in favour of females  $\leq 12$  weeks and 45:55 in favour of males  $\geq 13$  weeks)<sup>7</sup>.  
259 Similarly, the number of conceptions that result in miscarriage is unknown, but the values used here (10%,  
260 20%, 25%, 33%) are in accordance with accepted ranges<sup>11-14</sup>. However, far higher values have been  
261 proposed. In 1975, Roberts and Lowe attempted to predict the annual number of conceptions in England and  
262 Wales in 1971<sup>64</sup>, and suggested that up to 78% of conceptions were lost. Their analysis was based only on

263 married women, hypothesised a mean frequency of coitus twice a week (one in four of which was  
264 unprotected), and did not include data for pregnancies ending in abortion. Using data from the National  
265 Surveys of Sexual Attitudes and Lifestyles (Natsal) it is possible to refine these calculations, and Natsal-3<sup>65</sup>  
266 suggests that women aged 16-44 in the survey period (6<sup>th</sup> September 2010 – 31<sup>st</sup> August 2012) had on  
267 average 4.9 occasions of sexual intercourse (defined as vaginal, oral or anal intercourse) in the preceding 4  
268 weeks, of which 69% included vaginal sex (defined as a man’s penis in a woman’s vagina). The frequency of  
269 sexual intercourse for this age group is likely nearer 1.2 occasions per week, with 0.85 instances of vaginal  
270 sex per week. The annual frequency (i.e. for 52 weeks) of vaginal sex for women aged 16-44 in the survey  
271 period was therefore 44.2, not the 104 previously used by Roberts and Lowe<sup>64</sup>. The proportion of  
272 unprotected acts of coitus during the survey period is also now lower than the 25% estimate of Roberts and  
273 Lowe, and is likely nearer 5-7% for women aged 16-44<sup>66</sup>, increasing to around 10% if less effective methods  
274 of contraception are included, or to 1/6 if some consideration is given to those trying to conceive or who  
275 were already pregnant. The number of unprotected instances of vaginal sex per woman per year is therefore  
276 around 7, and, of these, 1/14 will occur within 48 hours of ovulation. Given a fertilisation rate of around 60%  
277 in *in vitro* fertilisation<sup>67</sup>, where sperm quality is likely higher than that of a “normal” ejaculate, an *in vivo*  
278 fertilisation rate of one in three seems reasonable. The Office for National Statistics mid-year population  
279 estimate for mid-2012 predicted that there were 8,884,341 women between the ages of 16-39 in England and  
280 Wales, and using these values I have estimated the number of “missing” conceptions (i.e. those not  
281 accounted for in the relevant live birth, stillbirth and abortion statistics, which can be considered to represent  
282 miscarried products of conception) (Table 3). For women aged 16-39 in 2012, the overall miscarriage rate  
283 was 43%, and for women aged 20-39 (responsible for 91% of all live births, 88% of stillbirths and 78% of  
284 abortions), the average rate of loss was 38%. Given the inherent uncertainty in these calculations, the  
285 miscarriage ranges used in my analysis (10%, 20%, 25%, 33%) therefore seem in accordance with this  
286 theoretical prediction, and the identification of an inherent female bias seems robust.

287 Finally, it should be noted that I cannot (and do not) make any distinction between sporadic and recurrent  
288 miscarriages. This may prove to be significant in future, as a study of fetal sex in recurrent miscarriages<sup>16</sup>  
289 found a much higher females-biased sex ratio than found here (64:36, based on 313 products of conception),  
290 although this study may have had issues with maternal contamination, and is based on a much smaller  
291 sample size. Luckily, we are now in a position where investigation of miscarriage sex bias may not be so

292 heavily influenced by maternal contamination, as cell-free fetal DNA<sup>68</sup> offers an alternative method of  
293 determining fetal sex based on presence or absence of a Y chromosome (or a specific region of the Y  
294 chromosome)<sup>69,70</sup>, even as early as 5-7 weeks of gestation. With an appropriate program of blood sampling  
295 and tracking of pregnancy outcomes, it will be possible to assess miscarriage sex ratio, and definitively show  
296 to what extent fetal sex influences adverse pregnancy outcomes.

297

298 Acknowledgements:

299 I would like to thank Tom Brekke, Daniel Brison and David Steinsaltz for comments and advice on the  
300 manuscript, and Gudrun Rieck for general discussion.

301

302 Funding statement:

303 No relevant funding to declare.

304

305 Author contributions:

306 JFM did everything.

307

308 References:

- 309 1. Machado, A. F., Zimmerman, E. F., Hovland, D. N., Weiss, R. & Collins, M. D. Diabetic  
310 embryopathy in C57BL/6J mice. Altered fetal sex ratio and impact of the splotch allele. *Diabetes* **50**,  
311 1193–9 (2001).
- 312 2. Gutiérrez-Adán, A., Granados, J., Pintado, B. & De La Fuente, J. Influence of glucose on the sex ratio  
313 of bovine IVM/IVF embryos cultured in vitro. *Reprod. Fertil. Dev.* **13**, 361–5 (2001).
- 314 3. Kimura, K., Spate, L. D., Green, M. P. & Roberts, R. M. Effects of oxidative stress and inhibitors of  
315 the pentose phosphate pathway on sexually dimorphic production of IFN- $\gamma$  by bovine blastocysts.  
316 *Mol. Reprod. Dev.* **68**, 88–95 (2004).
- 317 4. Cameron, E. Z., Lemons, P. R., Bateman, P. W. & Bennett, N. C. Experimental alteration of litter sex  
318 ratios in a mammal. *Proc. R. Soc. B Biol. Sci.* **275**, 323–327 (2008).
- 319 5. Urquia, M. L. *et al.* Sex ratios at birth after induced abortion. *CMAJ* **188**, E181-90 (2016).
- 320 6. Mondal, D., Galloway, T. S., Bailey, T. C. & Mathews, F. Elevated risk of stillbirth in males:

- 321 Systematic review and meta-analysis of more than 30 million births. *BMC Med.* **12**, 220 (2014).
- 322 7. Orzack, S. H. *et al.* The human sex ratio from conception to birth. *Proc. Natl. Acad. Sci. U. S. A.* **112**,
- 323 E2102-11 (2015).
- 324 8. Boklage, C. E. The epigenetic environment: secondary sex ratio depends on differential survival in
- 325 embryogenesis. *Hum. Reprod.* **20**, 583–587 (2005).
- 326 9. Catalano, R., Bruckner, T., Gould, J., Eskenazi, B. & Anderson, E. Sex ratios in California following
- 327 the terrorist attacks of September 11, 2001. *Hum. Reprod.* **20**, 1221–1227 (2005).
- 328 10. Masukume, G., O’Neill, S. M., Khashan, A. S., Kenny, L. C. & Grech, V. The Terrorist Attacks and
- 329 the Human Live Birth Sex Ratio: a Systematic Review and Meta-Analysis. *Acta Medica (Hradec*
- 330 *Kral. Czech Republic)* **60**, 59–65 (2017).
- 331 11. Wilcox, A. J. *et al.* Incidence of Early Loss of Pregnancy. *N. Engl. J. Med.* **319**, 189–194 (1988).
- 332 12. Maconochie, N., Doyle, P., Prior, S. & Simmons, R. Risk factors for first trimester miscarriage-
- 333 results from a UK-population-based case-control study. *BJOG An Int. J. Obstet. Gynaecol.* **114**, 170–
- 334 186 (2007).
- 335 13. Ammon Avalos, L., Galindo, C. & Li, D.-K. A systematic review to calculate background
- 336 miscarriage rates using life table analysis. *Birth Defects Res. Part A Clin. Mol. Teratol.* **94**, 417–423
- 337 (2012).
- 338 14. Wilcox, A. J., Baird, D. D. & Weinberg, C. R. Time of Implantation of the Conceptus and Loss of
- 339 Pregnancy. *N. Engl. J. Med.* **340**, 1796–1799 (1999).
- 340 15. Wang, X. *et al.* Conception, early pregnancy loss, and time to clinical pregnancy: a population-based
- 341 prospective study. *Fertil. Steril.* **79**, 577–584 (2003).
- 342 16. Del Fabro, A. *et al.* Fetal gender ratio in recurrent miscarriages. *Int. J. Womens. Health* **3**, 213–7
- 343 (2011).
- 344 17. Cantwell, R. *et al.* Saving Mothers’ Lives: Reviewing maternal deaths to make motherhood safer:
- 345 2006-2008. The Eighth Report of the Confidential Enquiries into Maternal Deaths in the United
- 346 Kingdom. *Bjog* **118 Suppl**, 1–203 (2011).
- 347 18. Lanasa, M. C., Hogge, W. A. & Hoffman, E. P. Sex Chromosome Genetics ’99. The X chromosome
- 348 and recurrent spontaneous abortion: the significance of transmanifesting carriers. *Am. J. Hum. Genet.*
- 349 **64**, 934–8 (1999).

- 350 19. Lanasa, M. C., Hogge, W. A., Kubik, C., Blancato, J. & Hoffman, E. P. Highly Skewed X-  
351 Chromosome Inactivation Is Associated with Idiopathic Recurrent Spontaneous Abortion. *Am. J.*  
352 *Hum. Genet.* **65**, 252–254 (1999).
- 353 20. Lanasa, M. C. *et al.* A novel X chromosome–linked genetic cause of recurrent spontaneous abortion.  
354 *Am. J. Obstet. Gynecol.* **185**, 563–568 (2001).
- 355 21. Sangha, K. K., Stephenson, M. D., Brown, C. J. & Robinson, W. P. Extremely Skewed X-  
356 Chromosome Inactivation Is Increased in Women with Recurrent Spontaneous Abortion. *Am. J. Hum.*  
357 *Genet.* **65**, 913–917 (1999).
- 358 22. Uehara, S. *et al.* Preferential X-chromosome inactivation in women with idiopathic recurrent  
359 pregnancy loss. *Fertil. Steril.* **76**, 908–14 (2001).
- 360 23. Sullivan, A. E. *et al.* Pregnancy outcome in recurrent miscarriage patients with skewed X  
361 chromosome inactivation. *Obstet. Gynecol.* **101**, 1236–42 (2003).
- 362 24. Bagislar, S. *et al.* Extremely skewed X-chromosome inactivation patterns in women with recurrent  
363 spontaneous abortion. *Aust. New Zeal. J. Obstet. Gynaecol.* **46**, 384–387 (2006).
- 364 25. Kaare, M., Painter, J. N., Ulander, V.-M., Kaaja, R. & Aittomä, K. RECURRENT PREGNANCY  
365 LOSS Sex chromosome characteristics and recurrent miscarriage. *Fertil. Steril.* **90**, 2328–2333
- 366 26. Warburton, D. *et al.* Skewed X chromosome inactivation and trisomic spontaneous abortion: no  
367 association. *Am. J. Hum. Genet.* **85**, 179–93 (2009).
- 368 27. Tolmacheva, E. N. *et al.* Skewed X-chromosome inactivation in human miscarriages. *Cell tissue biol.*  
369 **10**, 55–59 (2016).
- 370 28. Sui, Y., Chen, Q., Sun, X. & Ai, S. J. Association of skewed X chromosome inactivation and  
371 idiopathic recurrent spontaneous abortion: a systematic review and meta-analysis. *Reprod. Biomed.*  
372 *Online* **31**, 140–148 (2015).
- 373 29. Haig, D. Genetic conflicts in human pregnancy. *Q. Rev. Biol.* **68**, 495–532 (1993).
- 374 30. Moore, T. & Haig, D. Genomic imprinting in mammalian development: a parental tug-of-war. *Trends*  
375 *Genet.* **7**, 45–49 (1991).
- 376 31. Burt, A. & Trivers, R. Genetic conflicts in genomic imprinting. *Proc. R. Soc. B Biol. Sci.* **265**, 2393–  
377 2397 (1998).
- 378 32. Holman, L. & Kokko, H. The evolution of genomic imprinting: costs, benefits and long-term

- 379 consequences. *Biol. Rev.* **89**, 568–587 (2014).
- 380 33. Palcu, P. & Morostes, A. F. Profiling As a Logical Form of Reasoning in Order To Solve  
381 Controversial Circumstances. *J. Legal Stud.* **17**, 46–57 (2016).
- 382 34. Iwasa, Y., Mochizuki, A. & Takeda, Y. The evolution of genomic imprinting: Abortion and  
383 overshoot explain aberrations. *Evol. Ecol. Res.* **1**, 129–148 (1999).
- 384 35. Pongou, R. Why Is Infant Mortality Higher in Boys Than in Girls? A New Hypothesis Based on  
385 Preconception Environment and Evidence From a Large Sample of Twins. *Demography* **50**, 421–444  
386 (2013).
- 387 36. Potashnik, G., Insler, V., Meizner, I. & Sternberg, M. Frequency, sequence, and side of ovulation in  
388 women menstruating normally. *Br. Med. J. (Clin. Res. Ed)*. **294**, 219 (1987).
- 389 37. Järvelä, I., Nuojua-Huttunen, S. & Martikainen, H. Ovulation side and cycle fecundity: A  
390 retrospective analysis of frozen/thawed embryo transfer cycles. *Hum. Reprod.* **15**, 1247–1249 (2000).
- 391 38. Fukuda, M., Fukuda, K., Andersen, C. Y. & Byskov, A. G. Right-sided ovulation favours pregnancy  
392 more than left-sided ovulation. *Hum. Reprod.* **15**, 1921–6 (2000).
- 393 39. Fukuda, M. *et al.* The ovulation pattern during three consecutive menstrual cycles has a significant  
394 impact on pregnancy rate and sex of the offspring. *Fertil. Steril.* **95**, 2545–2547 (2011).
- 395 40. Lan, K. C. *et al.* Significantly superior response in the right ovary compared with the left ovary after  
396 stimulation with follicle-stimulating hormone in a pituitary down-regulation regimen. *Fertil. Steril.*  
397 **93**, 2269–2273 (2010).
- 398 41. Guioli, S. & Lovell-Badge, R. PITX2 controls asymmetric gonadal development in both sexes of the  
399 chick and can rescue the degeneration of the right ovary. *Development* **134**, 4199–4208 (2007).
- 400 42. Ishimaru, Y. *et al.* Mechanism of asymmetric ovarian development in chick embryos. *Development*  
401 **135**, 677–85 (2008).
- 402 43. McLaren, A. The distribution of eggs and embryos between sides in the mouse. *J. Endocrinol.* **27**,  
403 157–181 (1963).
- 404 44. Bernard, R. T. F. Female Reproductive Anatomy and Development of Ovarian Follicles in  
405 *Miniopterus Fraterculus* Female reproductive anatomy and development of ovarian follicles in  
406 *Miniopterusfraterculus*. *South African J. Zool. S. Afr. J. Zool* **15**, 111–116 (1980).
- 407 45. Hellwing, S. & Funkenstein, B. Ovarian asymmetry in the shrew, *Crocidura russula monacha*.

- 408 46. Domínguez, R., Morales, L. & Cruz, M. E. Ovarian asymmetry. *Ann Rev Biomed Sci* **5**, 95–104  
409 (2003).
- 410 47. Spinage, C. A. Reproduction in the Uganda defassa waterbuck, *Kobus defassa Uganda* Neumann. *J.*  
411 *Reprod. Fertil.* **18**, 445–57 (1969).
- 412 48. Clark, M. M. & Galef, B. G. Sexual segregation in the left and right horns of the gerbil uterus: “The  
413 male embryo is usually on the right, the female on the left” (Hippocrates). *Dev. Psychobiol.* **23**, 29–  
414 37 (1990).
- 415 49. Clark, M. M., Ham, M. & Galef, B. G. Differences in the sex ratios of offspring originating in the  
416 right and left ovaries of Mongolian gerbils (*Meriones unguiculatus*). *Reproduction* **101**, 393–396  
417 (1994).
- 418 50. Hylan, D. *et al.* Sex Ratio of Bovine Embryos and Calves Originating from the Left and Right  
419 Ovaries 1. *Biol. Reprod.* **81**, 933–938 (2009).
- 420 51. James, W. H. & Grech, V. Offspring sex ratio: Coital rates and other potential causal mechanisms.  
421 *Early Human Development* **116**, 24–27 (2018).
- 422 52. James, W. H. Evidence that mammalian sex ratios at birth are partially controlled by parental  
423 hormone levels around the time of conception. *J. Endocrinol.* **198**, 3–15 (2008).
- 424 53. Vandenberg, J. G. & Huggett, C. L. Mother’s prior intrauterine position affects the sex ratio of her  
425 offspring in house mice. *Proc. Natl. Acad. Sci.* **91**, 11055–11059 (1994).
- 426 54. Clark, M. M., Karpiuk, P. & Galef, B. G. Hormonally mediated inheritance of acquired  
427 characteristics in Mongolian gerbils. *Nature* **364**, 712 (1993).
- 428 55. Vandenberg, J. G. And brother begat nephew. *Nature* **366**, 671–672 (1993).
- 429 56. Grant, V. J. & Irwin, R. J. Follicular fluid steroid levels and subsequent sex of bovine embryos. *J.*  
430 *Exp. Zool. Part A Comp. Exp. Biol.* **303A**, 1120–1125 (2005).
- 431 57. Grant, V. J., Irwin, R. J., Standley, N. T., Shelling, A. N. & Chamley, L. W. Sex of Bovine Embryos  
432 May Be Related to Mothers’ Preovulatory Follicular Testosterone1. *Biol. Reprod.* **78**, 812–815  
433 (2008).
- 434 58. Ehrlich, S. F., Eskenazi, B., Hedderson, M. M. & Ferrara, A. Sex ratio variations among the offspring  
435 of women with diabetes in pregnancy. *Diabet. Med.* **29**, e273-8 (2012).
- 436 59. Jaiswal, B. S., Tur-Kaspa, I., Dor, J., Mashiach, S. & Eisenbach, M. Human Sperm Chemotaxis: Is



- 437 Progesterone a Chemoattractant?1. *Biol. Reprod.* **60**, 1314–1319 (1999).
- 438 60. Teves, M. E. *et al.* Progesterone at the picomolar range is a chemoattractant for mammalian  
439 spermatozoa. *Fertil. Steril.* **86**, 745–749 (2006).
- 440 61. Guidobaldi, H. A., Teves, M. E., Uñates, D. R., Anastasía, A. & Giojalas, L. C. Progesterone from the  
441 Cumulus Cells Is the Sperm Chemoattractant Secreted by the Rabbit Oocyte Cumulus Complex.  
442 *PLoS One* **3**, e3040 (2008).
- 443 62. Oren-Benaroya, R., Orvieto, R., Gakamsky, A., Pinchasov, M. & Eisenbach, M. The sperm  
444 chemoattractant secreted from human cumulus cells is progesterone. *Hum. Reprod.* **23**, 2339–2345  
445 (2008).
- 446 63. Guidobaldi, H. A. *et al.* Sperm chemorepulsion, a supplementary mechanism to regulate fertilization.  
447 *Hum. Reprod.* **32**, 1560–1573 (2017).
- 448 64. Roberts, C. & Lowe, C. Where have all the conceptions gone? *Lancet* **305**, 498–499 (1975).
- 449 65. Mercer, C. H. *et al.* Changes in sexual attitudes and lifestyles in Britain through the life course and  
450 over time: Findings from the National Surveys of Sexual Attitudes and Lifestyles (Natsal). *Lancet*  
451 **382**, 1781–1794 (2013).
- 452 66. Wellings, K. *et al.* The prevalence of unplanned pregnancy and associated factors in Britain: Findings  
453 from the third National Survey of Sexual Attitudes and Lifestyles (Natsal-3). *Lancet* **382**, 1807–1816  
454 (2013).
- 455 67. Braude, P. & Rowell, P. Assisted conception. II—In vitro fertilisation and intracytoplasmic sperm  
456 injection. *BMJ* **327**, 852 (2003).
- 457 68. Lo, Y. M. D. *et al.* Presence of fetal DNA in maternal plasma and serum. *Lancet* **350**, 485–487  
458 (1997).
- 459 69. Rijnders, R. J. P. *et al.* Earliest gestational age for fetal sexing in cell-free maternal plasma. *Prenat.*  
460 *Diagn.* **23**, 1042–1044 (2003).
- 461 70. Illanes, S., Denbow, M., Kailasam, C., Finning, K. & Soothill, P. W. Early detection of cell-free fetal  
462 DNA in maternal plasma. *Early Hum. Dev.* **83**, 563–566 (2007).
- 463
- 464
- 465



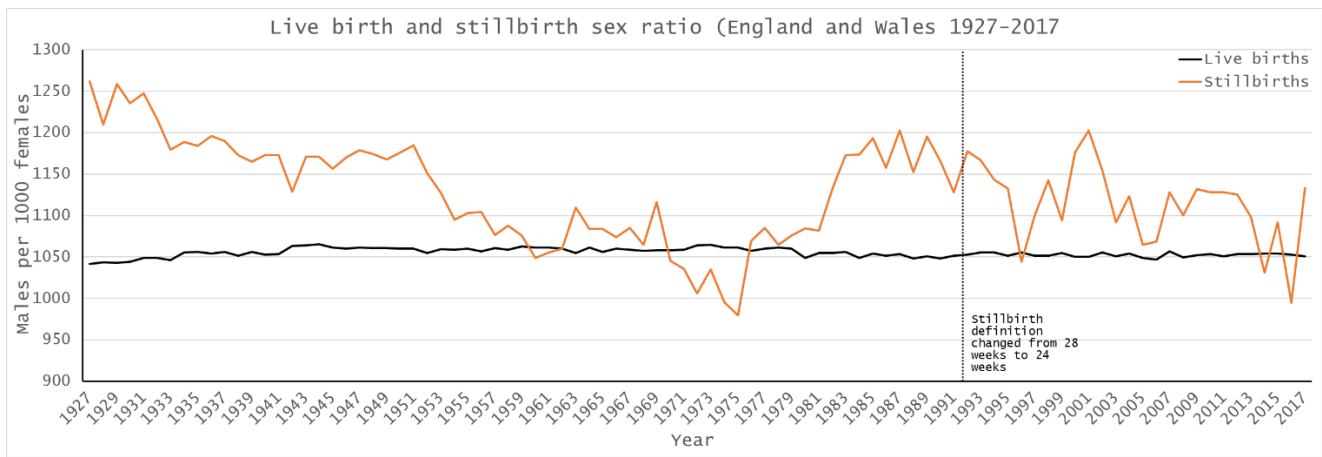

466

467 Figure 1. Live birth and stillbirth sex ratio in England and Wales, 1927-2017. On average 1,055 males were  
468 born per 1,000 females, and there are no years where more females are born than boys. The definition of  
469 stillbirth changed from 28 weeks of gestation to 24 weeks of gestation in 1992, and on average 1,133 boys  
470 were stillborn per 1,000 girls between 1927 and 1992, and 1,112 per 1,000 between 1993 and 2017. In the  
471 entire dataset, there are only three years where more girls were stillborn than boys (1974, 1975, 2016).

472

473

474

475

476

477

478

479

480

481

482

483

484

485

486

487

488

489

490

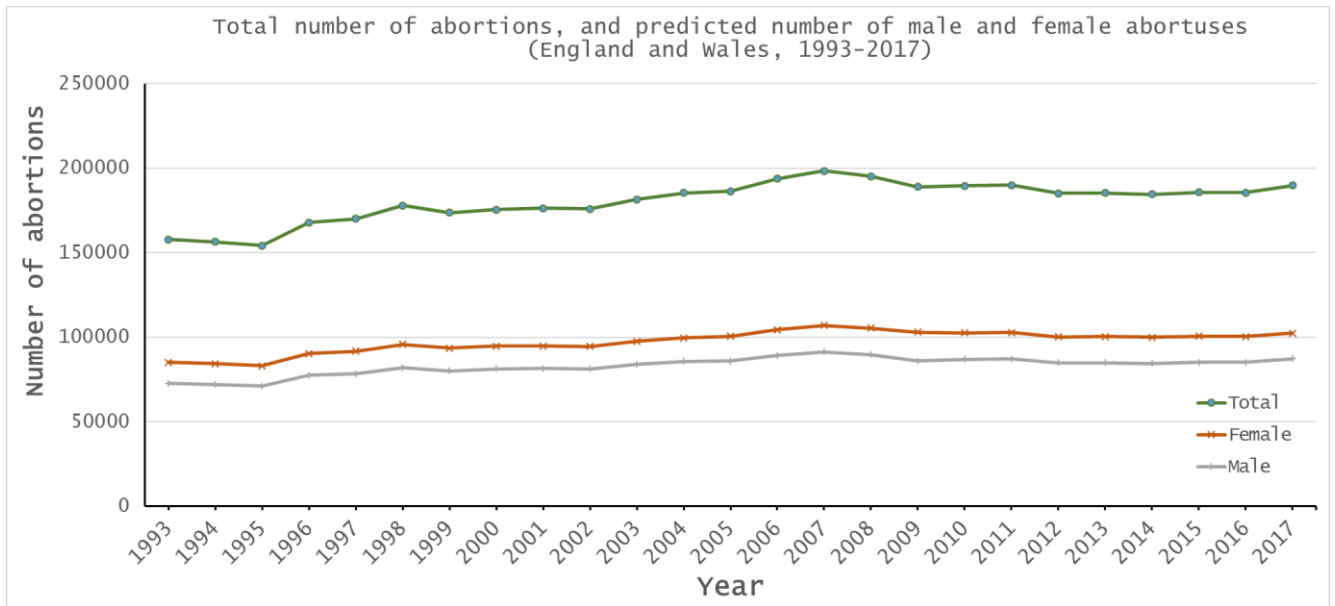

491

492 Figure 2. Sex ratio of legal abortions in England and Wales, 1993-2017, determined on the assumption that  
493 early ( $\leq 12$  weeks) abortions are biased towards females (55:45) and later abortions ( $\geq 13$  weeks) are biased  
494 towards males (45:55).

495

496

497

498

499

500

501

502

503

504

505

506

507

508

509

510

511

512

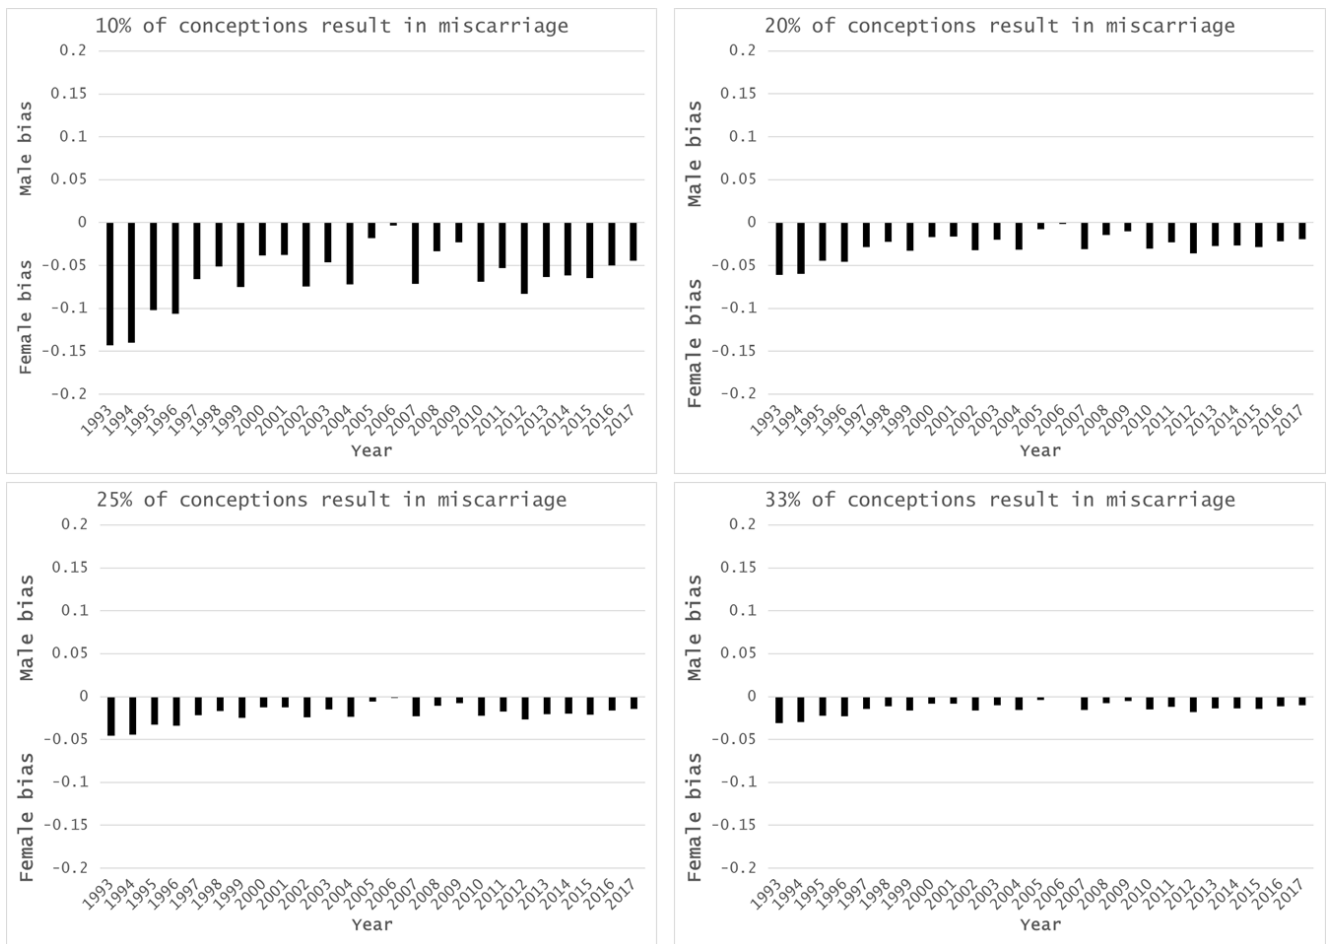

513

514 Figure 3. Relative miscarriage sex bias in England and Wales, 1993-2017, calculated as  $1 - (\text{females}$   
515  $\text{miscarried} / \text{males miscarried})$ , calculated if 10%, 20%, 25% or 33% of all conceptions result in miscarriage.  
516 A value of 0 would indicate no bias, a positive value would show male bias, and a negative value a female  
517 bias. Average values are -0.071 for the 10% dataset, -0.035 for 20%, -0.028 for 25% and -0.021 for 33%).  
518 Miscarriages are biased towards females in every year of this 25 year dataset, with a marked decrease in the  
519 miscarriage sex ratio around 2005-2006, following the 7<sup>th</sup> July 2005 terrorist bombings in London.

520

521

522

523

524

525

526

527

528

**Table 1. Live births, stillbirths and abortions in England and Wales, 1993-2017. Numbers of males and females for live births and stillbirths reflect classifications as recorded on the relevant birth registers. Abortus sex is calculated from the total number of abortions on the assumption that the sex ratio  $\leq 12$  weeks of gestation is 55:45 in favour of females, and 45:55 in favour of males from  $\geq 13$  weeks of gestation. Total or average values are provided in the bottom rows.**

| Year     | Live births |         |         |                                                     | Stillbirths |        |       |                                                    | Abortions |         |         |                                                | Pregnancies<br>(live births + stillbirth<br>+ abortions) |
|----------|-------------|---------|---------|-----------------------------------------------------|-------------|--------|-------|----------------------------------------------------|-----------|---------|---------|------------------------------------------------|----------------------------------------------------------|
|          | Total       | Female  | Male    | Male live births<br>per 1,000 female<br>live births | Total       | Female | Male  | Male stillbirths per<br>1000 female<br>stillbirths | Total     | Female  | Male    | Male abortuses<br>per 1000 female<br>abortuses |                                                          |
| 1993     | 673467      | 327632  | 345835  | 1056                                                | 3855        | 1779   | 2076  | 1167                                               | 157846    | 85072   | 72775   | 855                                            | 835168                                                   |
| 1994     | 664726      | 323405  | 341321  | 1055                                                | 3813        | 1779   | 2034  | 1143                                               | 156539    | 84363   | 72176   | 856                                            | 825078                                                   |
| 1995     | 648138      | 315950  | 332188  | 1051                                                | 3600        | 1688   | 1912  | 1133                                               | 154315    | 83211   | 71104   | 854                                            | 806053                                                   |
| 1996     | 649485      | 315995  | 333490  | 1055                                                | 3539        | 1731   | 1808  | 1044                                               | 167916    | 90444   | 77472   | 857                                            | 820940                                                   |
| 1997     | 642093      | 313021  | 329072  | 1051                                                | 3439        | 1638   | 1801  | 1100                                               | 170145    | 91732   | 78413   | 855                                            | 815677                                                   |
| 1998     | 635901      | 309998  | 325903  | 1051                                                | 3417        | 1595   | 1822  | 1142                                               | 177871    | 95875   | 81996   | 855                                            | 817189                                                   |
| 1999     | 621872      | 302617  | 319255  | 1055                                                | 3305        | 1578   | 1727  | 1094                                               | 173701    | 93634   | 80067   | 855                                            | 798878                                                   |
| 2000     | 604441      | 294816  | 309625  | 1050                                                | 3203        | 1472   | 1731  | 1176                                               | 175542    | 94485   | 81057   | 858                                            | 783186                                                   |
| 2001     | 594634      | 289999  | 304635  | 1050                                                | 3159        | 1434   | 1725  | 1203                                               | 176364    | 94851   | 81513   | 859                                            | 774157                                                   |
| 2002     | 596122      | 290059  | 306063  | 1055                                                | 3372        | 1565   | 1807  | 1155                                               | 175932    | 94542   | 81390   | 861                                            | 775426                                                   |
| 2003     | 621469      | 303041  | 318428  | 1051                                                | 3585        | 1711   | 1874  | 1091                                               | 181582    | 97557   | 84025   | 861                                            | 806636                                                   |
| 2004     | 639721      | 311381  | 328340  | 1054                                                | 3686        | 1736   | 1950  | 1123                                               | 185415    | 99690   | 85725   | 860                                            | 828822                                                   |
| 2005     | 645835      | 315235  | 330600  | 1049                                                | 3483        | 1687   | 1796  | 1065                                               | 186416    | 100535  | 85881   | 854                                            | 835734                                                   |
| 2006     | 669601      | 327172  | 342429  | 1047                                                | 3602        | 1741   | 1861  | 1069                                               | 193737    | 104469  | 89268   | 854                                            | 866940                                                   |
| 2007     | 690013      | 335525  | 354488  | 1057                                                | 3598        | 1691   | 1907  | 1128                                               | 198499    | 107139  | 91360   | 853                                            | 892110                                                   |
| 2008     | 708711      | 345748  | 362963  | 1050                                                | 3617        | 1722   | 1895  | 1100                                               | 195296    | 105514  | 89782   | 851                                            | 907624                                                   |
| 2009     | 706248      | 344113  | 362135  | 1052                                                | 3688        | 1730   | 1958  | 1132                                               | 189100    | 103114  | 85986   | 834                                            | 899036                                                   |
| 2010     | 723165      | 352199  | 370966  | 1053                                                | 3714        | 1745   | 1969  | 1128                                               | 189574    | 102582  | 86992   | 848                                            | 916453                                                   |
| 2011     | 723913      | 352939  | 370974  | 1051                                                | 3811        | 1791   | 2020  | 1128                                               | 189931    | 102787  | 87144   | 848                                            | 917655                                                   |
| 2012     | 729674      | 355328  | 374346  | 1054                                                | 3558        | 1674   | 1884  | 1125                                               | 185122    | 100150  | 84972   | 848                                            | 918354                                                   |
| 2013     | 698512      | 340129  | 358383  | 1054                                                | 3284        | 1565   | 1719  | 1098                                               | 185331    | 100360  | 84971   | 847                                            | 887127                                                   |
| 2014     | 695233      | 338461  | 356772  | 1054                                                | 3254        | 1602   | 1652  | 1031                                               | 184571    | 99998   | 84573   | 846                                            | 883058                                                   |
| 2015     | 697852      | 339716  | 358136  | 1054                                                | 3147        | 1498   | 1649  | 1092                                               | 185824    | 100649  | 85175   | 846                                            | 886823                                                   |
| 2016     | 696271      | 339225  | 357046  | 1053                                                | 3112        | 1560   | 1552  | 995                                                | 185596    | 100501  | 85095   | 847                                            | 884979                                                   |
| 2017     | 679106      | 331035  | 348071  | 1051                                                | 2873        | 1347   | 1526  | 1133                                               | 189859    | 102488  | 87371   | 853                                            | 871838                                                   |
| Total:   | 16656203    | 8114739 | 8541464 | -                                                   | 86714       | 41059  | 45655 | -                                                  | 4512024   | 2435740 | 2076284 | -                                              | 21254941                                                 |
| Average: | 666248      | 324590  | 341659  | 1053                                                | 3469        | 1642   | 1826  | 1112                                               | 180481    | 97430   | 83051   | 853                                            | 850198                                                   |

**Table 2. Predicted miscarriages in England and Wales, 1993-2017. Values are determined based on the number of calculated number of conceptions, as determined by the number of live births, stillbirths and abortions, accounting for the relevant miscarriage risk factor (where 10%, 20%, 25% or 33% of all conceptions result in miscarriage). Total or average values are provided in the bottom rows.**

| Year     | 10% miscarriage |         |         |                        | 20% miscarriage |         |         |                        | 25% miscarriage |         |         |                        | 33% miscarriage |         |         |                        |
|----------|-----------------|---------|---------|------------------------|-----------------|---------|---------|------------------------|-----------------|---------|---------|------------------------|-----------------|---------|---------|------------------------|
|          | Total           | Females | Males   | Males per 1000 females | Total           | Females | Males   | Males per 1000 females | Total           | Females | Males   | Males per 1000 females | Total           | Females | Males   | Males per 1000 females |
| 1993     | 92796           | 49500   | 43297   | 875                    | 208792          | 107498  | 101295  | 942                    | 278389          | 142296  | 136093  | 956                    | 411351          | 208777  | 202574  | 970                    |
| 1994     | 91675           | 48829   | 42846   | 877                    | 206270          | 106126  | 100143  | 944                    | 275026          | 140505  | 134521  | 957                    | 406382          | 206183  | 200199  | 971                    |
| 1995     | 89561           | 46958   | 42604   | 907                    | 201513          | 102934  | 98579   | 958                    | 268684          | 136519  | 132165  | 968                    | 397011          | 200683  | 196328  | 978                    |
| 1996     | 91216           | 47908   | 43308   | 904                    | 205235          | 104917  | 100318  | 956                    | 273647          | 139123  | 134524  | 967                    | 404344          | 204472  | 199872  | 978                    |
| 1997     | 90631           | 46763   | 43868   | 938                    | 203919          | 103407  | 100512  | 972                    | 271892          | 137394  | 134499  | 979                    | 401751          | 202323  | 199428  | 986                    |
| 1998     | 90799           | 46526   | 44273   | 952                    | 204297          | 103275  | 101022  | 978                    | 272396          | 137325  | 135071  | 984                    | 402496          | 202375  | 200121  | 989                    |
| 1999     | 88764           | 45992   | 42772   | 930                    | 199720          | 101470  | 98249   | 968                    | 266293          | 134757  | 131536  | 976                    | 393477          | 198349  | 195128  | 984                    |
| 2000     | 87021           | 44331   | 42690   | 963                    | 195797          | 98719   | 97078   | 983                    | 261062          | 131351  | 129711  | 988                    | 385748          | 193694  | 192054  | 992                    |
| 2001     | 86017           | 43804   | 42214   | 964                    | 193539          | 97564   | 95975   | 984                    | 258052          | 129821  | 128231  | 988                    | 381301          | 191445  | 189856  | 992                    |
| 2002     | 86158           | 44626   | 41533   | 931                    | 193857          | 98475   | 95382   | 969                    | 258475          | 130784  | 127691  | 976                    | 381926          | 192510  | 189417  | 984                    |
| 2003     | 89626           | 45822   | 43804   | 956                    | 201659          | 101839  | 99820   | 980                    | 268879          | 135449  | 133430  | 985                    | 397298          | 199658  | 197640  | 990                    |
| 2004     | 92091           | 47650   | 44441   | 933                    | 207206          | 105207  | 101998  | 970                    | 276274          | 139741  | 136533  | 977                    | 408226          | 205717  | 202509  | 984                    |
| 2005     | 92859           | 46839   | 46020   | 983                    | 208934          | 104876  | 104057  | 992                    | 278578          | 139699  | 138879  | 994                    | 411630          | 206225  | 205405  | 996                    |
| 2006     | 96327           | 48251   | 48075   | 996                    | 216735          | 108456  | 108279  | 998                    | 288980          | 144578  | 144402  | 999                    | 427000          | 213588  | 213412  | 999                    |
| 2007     | 99123           | 51262   | 47861   | 934                    | 223028          | 113214  | 109814  | 970                    | 297370          | 150385  | 146985  | 977                    | 439397          | 221399  | 217998  | 985                    |
| 2008     | 100847          | 51252   | 49595   | 968                    | 226906          | 114281  | 112625  | 986                    | 302541          | 152099  | 150442  | 989                    | 447039          | 224348  | 222691  | 993                    |
| 2009     | 99893           | 50507   | 49385   | 978                    | 224759          | 112941  | 111818  | 990                    | 299679          | 150400  | 149278  | 993                    | 442809          | 221965  | 220843  | 995                    |
| 2010     | 101828          | 52615   | 49213   | 935                    | 229113          | 116257  | 112856  | 971                    | 305484          | 154443  | 151041  | 978                    | 451387          | 227394  | 223993  | 985                    |
| 2011     | 101962          | 52292   | 49670   | 950                    | 229414          | 116018  | 113396  | 977                    | 305885          | 154253  | 151632  | 983                    | 451979          | 227301  | 224679  | 988                    |
| 2012     | 102039          | 53045   | 48994   | 924                    | 229589          | 116820  | 112769  | 965                    | 306118          | 155084  | 151034  | 974                    | 452324          | 228187  | 224137  | 982                    |
| 2013     | 98570           | 50794   | 47776   | 941                    | 221782          | 112400  | 109382  | 973                    | 295709          | 149364  | 146345  | 980                    | 436943          | 219981  | 216963  | 986                    |
| 2014     | 98118           | 50526   | 47591   | 942                    | 220765          | 111850  | 108915  | 974                    | 294353          | 148644  | 145709  | 980                    | 434939          | 218937  | 216002  | 987                    |
| 2015     | 98536           | 50816   | 47719   | 939                    | 221706          | 112401  | 109304  | 972                    | 295608          | 149352  | 146255  | 979                    | 436793          | 219945  | 216848  | 986                    |
| 2016     | 98331           | 50369   | 47962   | 952                    | 221245          | 111826  | 109419  | 978                    | 294993          | 148700  | 146293  | 984                    | 435885          | 219146  | 216739  | 989                    |
| 2017     | 96871           | 49485   | 47386   | 958                    | 217960          | 110029  | 107930  | 981                    | 290613          | 146356  | 144257  | 986                    | 429413          | 215756  | 213657  | 990                    |
| Total:   | 2361660         | 1216763 | 1144897 | -                      | 5313735         | 2692800 | 2620935 | -                      | 7084980         | 3578423 | 3506558 | -                      | 10468852        | 5270358 | 5198493 | -                      |
| Average: | 94466           | 55860   | 38607   | 941                    | 212549          | 107712  | 104837  | 973                    | 283399          | 143137  | 140262  | 980                    | 418754          | 210814  | 207940  | 986                    |

413 **Table 3. Theoretical prediction of the number of miscarried products of conception in England and Wales in**  
 414 **2012. Sexual habits are based on Natsal-3<sup>65</sup> for women aged 16-44, and the remaining data are from ONS**  
 415 **statistical datasets as described in the text. The predicted miscarriage rate is 43% overall, or 38% for women**  
 416 **aged 20-39 (responsible for the majority of live births, stillbirths and abortions).**  
 417

|                                                                               | Age      |          |          |          |          |           |
|-------------------------------------------------------------------------------|----------|----------|----------|----------|----------|-----------|
|                                                                               | Under 20 | 20-24    | 25-29    | 30-34    | 35-39    | All       |
| Number of women                                                               | 1362919  | 1893629  | 1925992  | 1898383  | 1803418  | 8884341   |
| Annual acts of vaginal sex (assuming 44 per woman per year)                   | 59968436 | 83319676 | 84743648 | 83528852 | 79350392 | 390911004 |
| Annual acts of unprotected vaginal sex (assuming one in six is unprotected)   | 9994739  | 13886613 | 14123941 | 13921475 | 13225065 | 65151834  |
| Unprotected acts occurring within 48-hour period around ovulation (i.e. 1/14) | 713910   | 991901   | 1008853  | 994391   | 944648   | 4653702   |
| Assume one in three of these results in fertilisation                         | 237970   | 330634   | 336284   | 331464   | 314883   | 1551234   |
| Number of live births to these women                                          | 33815    | 132456   | 202370   | 216242   | 114797   | 699680    |
| Number of stillbirths to these women                                          | 217      | 669      | 936      | 912      | 601      | 3118      |
| Number of abortions to these women                                            | 30539    | 54558    | 41882    | 30353    | 18523    | 145316    |
| Estimated loss                                                                | 173399   | 142951   | 91096    | 83957    | 180962   | 672364    |
| Percentage loss                                                               | 73%      | 43%      | 27%      | 25%      | 57%      | 43%       |

418

419

420

421

422

423

424

425

426

427

428

429

430

431

432

433

434

435

436

437

438

439

440 **Supplemental data**

441

442 **Table S1.** Predicted numbers of conceptions, and conceptus sex ratios, assuming a balanced primary sex ratio.

443

444 **Table S2.** Live birth, stillbirth and abortion numbers and sex ratios if the abortus sex ratio is balanced (i.e. an abortus  
445 has an equal probability of being male or female, irrespective of when in gestation the abortion occurred).

446

447 **Table S3.** Miscarriage numbers and sex ratios if the abortus sex ratio is balanced (i.e. an abortus has an equal  
448 probability of being male or female, irrespective of when in gestation the abortion occurred).

449

450 **Table S4.** Predicted primary sex ratios needed to remove miscarriage sex bias. Abortus sex is calculated from the total  
451 number of abortions on the assumption that the sex ratio  $\leq 12$  weeks of gestation is 55:45 in favour of females, and  
452 45:55 in favour of males from  $\geq 13$  weeks of gestation.

453

454 **Table S5.** Predicted primary sex ratios needed to remove miscarriage sex bias. Abortus sex is calculated on the  
455 assumption that the abortus sex ratio is balanced (i.e. an abortus has an equal probability of being male or female,  
456 irrespective of when in gestation the abortion occurred).

457

458 **Figure S1.** Relative miscarriage sex bias if the abortus sex ratio is balanced (i.e. an abortus has an equal probability of  
459 being male or female, irrespective of when in gestation the abortion occurred).

460

461

462

463

464

465

466

467

468

469

470

471

472

**Table S1. Predicted number of conceptions in England and Wales 1993-2017, determined as the sum of live births, stillbirths and abortions, and assuming that 10%, 20%, 25% or 33% of all conceptions result in miscarriage. The number of males and females conceived is equal (i.e. the primary sex ratio is 50:50). The year column refers to the year of registration of live births, stillbirths and abortions, and does not correlate to date of conception.**

| Year    | Pregnancies (live births + stillbirths + abortions) | Number of conceptions if 10%, 20%, 25% or 33% result in miscarriage |                   |                 |                   |                   |                 |                   |                   |                 |                   |                   |                 |
|---------|-----------------------------------------------------|---------------------------------------------------------------------|-------------------|-----------------|-------------------|-------------------|-----------------|-------------------|-------------------|-----------------|-------------------|-------------------|-----------------|
|         |                                                     | 10%                                                                 |                   |                 | 20%               |                   |                 | 25%               |                   |                 | 33%               |                   |                 |
|         |                                                     | Total conceptions                                                   | Females conceived | Males conceived | Total conceptions | Females conceived | Males conceived | Total conceptions | Females conceived | Males conceived | Total conceptions | Females conceived | Males conceived |
| 1993    | 835168                                              | 927964                                                              | 463982            | 463982          | 1043960           | 521980            | 521980          | 1113557           | 556779            | 556779          | 1246519           | 623260            | 623260          |
| 1994    | 825078                                              | 916753                                                              | 458377            | 458377          | 1031348           | 515674            | 515674          | 1100104           | 550052            | 550052          | 1231460           | 615730            | 615730          |
| 1995    | 806053                                              | 895614                                                              | 447807            | 447807          | 1007566           | 503783            | 503783          | 1074737           | 537369            | 537369          | 1203064           | 601532            | 601532          |
| 1996    | 820940                                              | 912156                                                              | 456078            | 456078          | 1026175           | 513088            | 513088          | 1094587           | 547293            | 547293          | 1225284           | 612642            | 612642          |
| 1997    | 815677                                              | 906308                                                              | 453154            | 453154          | 1019596           | 509798            | 509798          | 1087569           | 543785            | 543785          | 1217428           | 608714            | 608714          |
| 1998    | 817189                                              | 907988                                                              | 453994            | 453994          | 1021486           | 510743            | 510743          | 1089585           | 544793            | 544793          | 1219685           | 609843            | 609843          |
| 1999    | 798878                                              | 887642                                                              | 443821            | 443821          | 998598            | 499299            | 499299          | 1065171           | 532585            | 532585          | 1192355           | 596178            | 596178          |
| 2000    | 783186                                              | 870207                                                              | 435103            | 435103          | 978983            | 489491            | 489491          | 1044248           | 522124            | 522124          | 1168934           | 584467            | 584467          |
| 2001    | 774157                                              | 860174                                                              | 430087            | 430087          | 967696            | 483848            | 483848          | 1032209           | 516105            | 516105          | 1155458           | 577729            | 577729          |
| 2002    | 775426                                              | 861584                                                              | 430792            | 430792          | 969283            | 484641            | 484641          | 1033901           | 516951            | 516951          | 1157352           | 578676            | 578676          |
| 2003    | 806636                                              | 896262                                                              | 448131            | 448131          | 1008295           | 504148            | 504148          | 1075515           | 537757            | 537757          | 1203934           | 601967            | 601967          |
| 2004    | 828822                                              | 920913                                                              | 460457            | 460457          | 1036028           | 518014            | 518014          | 1105096           | 552548            | 552548          | 1237048           | 618524            | 618524          |
| 2005    | 835734                                              | 928593                                                              | 464297            | 464297          | 1044668           | 522334            | 522334          | 1114312           | 557156            | 557156          | 1247364           | 623682            | 623682          |
| 2006    | 866940                                              | 963267                                                              | 481633            | 481633          | 1083675           | 541838            | 541838          | 1155920           | 577960            | 577960          | 1293940           | 646970            | 646970          |
| 2007    | 892110                                              | 991233                                                              | 495617            | 495617          | 1115138           | 557569            | 557569          | 1189480           | 594740            | 594740          | 1331507           | 665754            | 665754          |
| 2008    | 907624                                              | 1008471                                                             | 504236            | 504236          | 1134530           | 567265            | 567265          | 1210165           | 605083            | 605083          | 1354663           | 677331            | 677331          |
| 2009    | 899036                                              | 998929                                                              | 499464            | 499464          | 1123795           | 561898            | 561898          | 1198715           | 599357            | 599357          | 1341845           | 670922            | 670922          |
| 2010    | 916453                                              | 1018281                                                             | 509141            | 509141          | 1145566           | 572783            | 572783          | 1221937           | 610969            | 610969          | 1367840           | 683920            | 683920          |
| 2011    | 917655                                              | 1019617                                                             | 509808            | 509808          | 1147069           | 573534            | 573534          | 1223540           | 611770            | 611770          | 1369634           | 684817            | 684817          |
| 2012    | 918354                                              | 1020393                                                             | 510197            | 510197          | 1147943           | 573971            | 573971          | 1224472           | 612236            | 612236          | 1370678           | 685339            | 685339          |
| 2013    | 887127                                              | 985697                                                              | 492848            | 492848          | 1108909           | 554454            | 554454          | 1182836           | 591418            | 591418          | 1324070           | 662035            | 662035          |
| 2014    | 883058                                              | 981176                                                              | 490588            | 490588          | 1103823           | 551911            | 551911          | 1177411           | 588705            | 588705          | 1317997           | 658999            | 658999          |
| 2015    | 886823                                              | 985359                                                              | 492679            | 492679          | 1108529           | 554264            | 554264          | 1182431           | 591215            | 591215          | 1323616           | 661808            | 661808          |
| 2016    | 884979                                              | 983310                                                              | 491655            | 491655          | 1106224           | 553112            | 553112          | 1179972           | 589986            | 589986          | 1320864           | 660432            | 660432          |
| 2017    | 871838                                              | 968709                                                              | 484354            | 484354          | 1089798           | 544899            | 544899          | 1162451           | 581225            | 581225          | 1301251           | 650625            | 650625          |
| Totals: | 21254941                                            | 23616601                                                            | 11808301          | 11808301        | 26568676          | 13284338          | 13284338        | 28339921          | 14169961          | 14169961        | 31723793          | 15861896          | 15861896        |



**Table S2. Live births, stillbirths and abortions in England and Wales, 1993-2017. Numbers of males and females for live births and stillbirths reflect classifications as recorded on the relevant birth registers. Abortus sex is calculated from the total number of abortions on the assumption that the abortus sex ratio is equal (i.e. an abortus has an equal probability of being male or female, irrespective of when the abortion occurred).**

| Year    | Live births |         |         |                                               | Stillbirths |        |       |                                              | Abortions |         |         |                                          |
|---------|-------------|---------|---------|-----------------------------------------------|-------------|--------|-------|----------------------------------------------|-----------|---------|---------|------------------------------------------|
|         | Total       | Female  | Male    | Male live births per 1,000 female live births | Total       | Female | Male  | Male stillbirths per 1000 female stillbirths | Total     | Female  | Male    | Male abortuses per 1000 female abortuses |
| 1993    | 673467      | 327632  | 345835  | 1056                                          | 3855        | 1779   | 2076  | 1167                                         | 157846    | 78923   | 78923   | 1000                                     |
| 1994    | 664726      | 323405  | 341321  | 1055                                          | 3813        | 1779   | 2034  | 1143                                         | 156539    | 78270   | 78270   | 1000                                     |
| 1995    | 648138      | 315950  | 332188  | 1051                                          | 3600        | 1688   | 1912  | 1133                                         | 154315    | 77158   | 77158   | 1000                                     |
| 1996    | 649485      | 315995  | 333490  | 1055                                          | 3539        | 1731   | 1808  | 1044                                         | 167916    | 83958   | 83958   | 1000                                     |
| 1997    | 642093      | 313021  | 329072  | 1051                                          | 3439        | 1638   | 1801  | 1100                                         | 170145    | 85073   | 85073   | 1000                                     |
| 1998    | 635901      | 309998  | 325903  | 1051                                          | 3417        | 1595   | 1822  | 1142                                         | 177871    | 88936   | 88936   | 1000                                     |
| 1999    | 621872      | 302617  | 319255  | 1055                                          | 3305        | 1578   | 1727  | 1094                                         | 173701    | 86851   | 86851   | 1000                                     |
| 2000    | 604441      | 294816  | 309625  | 1050                                          | 3203        | 1472   | 1731  | 1176                                         | 175542    | 87771   | 87771   | 1000                                     |
| 2001    | 594634      | 289999  | 304635  | 1050                                          | 3159        | 1434   | 1725  | 1203                                         | 176364    | 88182   | 88182   | 1000                                     |
| 2002    | 596122      | 290059  | 306063  | 1055                                          | 3372        | 1565   | 1807  | 1155                                         | 175932    | 87966   | 87966   | 1000                                     |
| 2003    | 621469      | 303041  | 318428  | 1051                                          | 3585        | 1711   | 1874  | 1091                                         | 181582    | 90791   | 90791   | 1000                                     |
| 2004    | 639721      | 311381  | 328340  | 1054                                          | 3686        | 1736   | 1950  | 1123                                         | 185415    | 92708   | 92708   | 1000                                     |
| 2005    | 645835      | 315235  | 330600  | 1049                                          | 3483        | 1687   | 1796  | 1065                                         | 186416    | 93208   | 93208   | 1000                                     |
| 2006    | 669601      | 327172  | 342429  | 1047                                          | 3602        | 1741   | 1861  | 1069                                         | 193737    | 96869   | 96869   | 1000                                     |
| 2007    | 690013      | 335525  | 354488  | 1057                                          | 3598        | 1691   | 1907  | 1128                                         | 198499    | 99250   | 99250   | 1000                                     |
| 2008    | 708711      | 345748  | 362963  | 1050                                          | 3617        | 1722   | 1895  | 1100                                         | 195296    | 97648   | 97648   | 1000                                     |
| 2009    | 706248      | 344113  | 362135  | 1052                                          | 3688        | 1730   | 1958  | 1132                                         | 189100    | 94550   | 94550   | 1000                                     |
| 2010    | 723165      | 352199  | 370966  | 1053                                          | 3714        | 1745   | 1969  | 1128                                         | 189574    | 94787   | 94787   | 1000                                     |
| 2011    | 723913      | 352939  | 370974  | 1051                                          | 3811        | 1791   | 2020  | 1128                                         | 189931    | 94966   | 94966   | 1000                                     |
| 2012    | 729674      | 355328  | 374346  | 1054                                          | 3558        | 1674   | 1884  | 1125                                         | 185122    | 92561   | 92561   | 1000                                     |
| 2013    | 698512      | 340129  | 358383  | 1054                                          | 3284        | 1565   | 1719  | 1098                                         | 185331    | 92666   | 92666   | 1000                                     |
| 2014    | 695233      | 338461  | 356772  | 1054                                          | 3254        | 1602   | 1652  | 1031                                         | 184571    | 92286   | 92286   | 1000                                     |
| 2015    | 697852      | 339716  | 358136  | 1054                                          | 3147        | 1498   | 1649  | 1092                                         | 185824    | 92912   | 92912   | 1000                                     |
| 2016    | 696271      | 339225  | 357046  | 1053                                          | 3112        | 1560   | 1552  | 995                                          | 185596    | 92798   | 92798   | 1000                                     |
| 2017    | 679106      | 331035  | 348071  | 1051                                          | 2873        | 1347   | 1526  | 1133                                         | 189859    | 94930   | 94930   | 1000                                     |
| Totals: | 16656203    | 8114739 | 8541464 | Av = 1053                                     | 86714       | 41059  | 45655 | Av = 1112                                    | 4512024   | 2256012 | 2256012 | Av = 1000                                |

**Table S3. Predicted miscarriages in England and Wales, 1993-2017, where abortus sex ratios are equal (i.e. an abortus has an equal probability of being male or female, irrespective of when the abortion occurred). Values are determined based on the number of calculated number of conceptions, as determined by the number of live births, stillbirths and abortions, accounting for the relevant miscarriage risk factor (where 10%, 20%, 25% or 33% of all conceptions end in miscarriage).**

| Year    | 10% miscarriage |         |       |                        | 20% miscarriage |         |        |                        | 25% miscarriage |         |        |                        | 33% miscarriage |         |        |                        |
|---------|-----------------|---------|-------|------------------------|-----------------|---------|--------|------------------------|-----------------|---------|--------|------------------------|-----------------|---------|--------|------------------------|
|         | Total           | Females | Males | Males per 1000 females | Total           | Females | Males  | Males per 1000 females | Total           | Females | Males  | Males per 1000 females | Total           | Females | Males  | Males per 1000 females |
| 1993    | 92796           | 55648   | 37148 | 668                    | 208792          | 113646  | 95146  | 837                    | 278389          | 148445  | 129945 | 875                    | 411351          | 214926  | 196426 | 914                    |
| 1994    | 91675           | 54923   | 36752 | 669                    | 206270          | 112220  | 94049  | 838                    | 275026          | 146599  | 128428 | 876                    | 406382          | 212276  | 194105 | 914                    |
| 1995    | 89561           | 53012   | 36550 | 689                    | 201513          | 108988  | 92526  | 849                    | 268684          | 142573  | 126111 | 885                    | 397011          | 206737  | 190275 | 920                    |
| 1996    | 91216           | 54394   | 36822 | 677                    | 205235          | 111404  | 93832  | 842                    | 273647          | 145609  | 128037 | 879                    | 404344          | 210958  | 193386 | 917                    |
| 1997    | 90631           | 53422   | 37208 | 696                    | 203919          | 110067  | 93853  | 853                    | 271892          | 144053  | 127839 | 887                    | 401751          | 208983  | 192769 | 922                    |
| 1998    | 90799           | 53465   | 37333 | 698                    | 204297          | 110215  | 94083  | 854                    | 272396          | 144264  | 128132 | 888                    | 402496          | 209314  | 193182 | 923                    |
| 1999    | 88764           | 52776   | 35989 | 682                    | 199720          | 108253  | 91466  | 845                    | 266293          | 141540  | 124753 | 881                    | 393477          | 205132  | 188345 | 918                    |
| 2000    | 87021           | 51044   | 35976 | 705                    | 195797          | 105432  | 90364  | 857                    | 261062          | 138065  | 122997 | 891                    | 385748          | 200408  | 185340 | 925                    |
| 2001    | 86017           | 50472   | 35545 | 704                    | 193539          | 104233  | 89306  | 857                    | 258052          | 136490  | 121563 | 891                    | 381301          | 198114  | 183187 | 925                    |
| 2002    | 86158           | 51202   | 34956 | 683                    | 193857          | 105051  | 88805  | 845                    | 258475          | 137361  | 121115 | 882                    | 381926          | 199086  | 182840 | 918                    |
| 2003    | 89626           | 52588   | 37038 | 704                    | 201659          | 108605  | 93055  | 857                    | 268879          | 142214  | 126664 | 891                    | 397298          | 206424  | 190874 | 925                    |
| 2004    | 92091           | 54632   | 37459 | 686                    | 207206          | 112189  | 95016  | 847                    | 276274          | 146724  | 129551 | 883                    | 408226          | 212699  | 195526 | 919                    |
| 2005    | 92859           | 54167   | 38693 | 714                    | 208934          | 112204  | 96730  | 862                    | 278578          | 147026  | 131552 | 895                    | 411630          | 213552  | 198078 | 928                    |
| 2006    | 96327           | 55852   | 40475 | 725                    | 216735          | 116056  | 100679 | 868                    | 288980          | 152179  | 136802 | 899                    | 427000          | 221189  | 205812 | 930                    |
| 2007    | 99123           | 59151   | 39972 | 676                    | 223028          | 121103  | 101924 | 842                    | 297370          | 158275  | 139096 | 879                    | 439397          | 229288  | 210109 | 916                    |
| 2008    | 100847          | 59118   | 41730 | 706                    | 226906          | 122147  | 104759 | 858                    | 302541          | 159965  | 142577 | 891                    | 447039          | 232213  | 214825 | 925                    |
| 2009    | 99893           | 59071   | 40821 | 691                    | 224759          | 121505  | 103255 | 850                    | 299679          | 158964  | 140714 | 885                    | 442809          | 230529  | 212279 | 921                    |
| 2010    | 101828          | 60410   | 41419 | 686                    | 229113          | 124052  | 105061 | 847                    | 305484          | 162238  | 143247 | 883                    | 451387          | 235189  | 216198 | 919                    |
| 2011    | 101962          | 60113   | 41849 | 696                    | 229414          | 123839  | 105575 | 853                    | 305885          | 162075  | 143811 | 887                    | 451979          | 235122  | 216858 | 922                    |
| 2012    | 102039          | 60634   | 41406 | 683                    | 229589          | 124408  | 105180 | 845                    | 306118          | 162673  | 143445 | 882                    | 452324          | 235776  | 216548 | 918                    |
| 2013    | 98570           | 58489   | 40081 | 685                    | 221782          | 120095  | 101687 | 847                    | 295709          | 157059  | 138651 | 883                    | 436943          | 227676  | 209268 | 919                    |
| 2014    | 98118           | 58239   | 39878 | 685                    | 220765          | 119563  | 101202 | 846                    | 294353          | 156357  | 137996 | 883                    | 434939          | 226650  | 208289 | 919                    |
| 2015    | 98536           | 58553   | 39982 | 683                    | 221706          | 120138  | 101567 | 845                    | 295608          | 157089  | 138518 | 882                    | 436793          | 227682  | 209111 | 918                    |
| 2016    | 98331           | 58072   | 40259 | 693                    | 221245          | 119529  | 101716 | 851                    | 294993          | 156403  | 138590 | 886                    | 435885          | 226849  | 209036 | 921                    |
| 2017    | 96871           | 57043   | 39828 | 698                    | 217960          | 117587  | 100372 | 854                    | 290613          | 153914  | 136699 | 888                    | 429413          | 223314  | 206099 | 923                    |
| Average | 94466           | 55860   | 38607 | 691                    | 212549          | 114901  | 97648  | 850                    | 283399          | 150326  | 133073 | 885                    | 418754          | 218003  | 200751 | 921                    |

**Table S4. The predicted primary (conception) sex ratio (PSR) required to remove the female bias in miscarriage in England and Wales 1993-2017, determined as the sum of live births, stillbirths and abortions, and assuming that 10%, 20%, 25% or 33% of all conceptions result in miscarriage. Abortus sex is calculated from the total number of abortions on the assumption that the sex ratio  $\leq 12$  weeks of gestation is 55:45 in favour of females, and 45:55 in favour of males from  $\geq 13$  weeks of gestation. If 49.85% and 49.89% of conceptions are female, the proportion of males and females subsequently lost to miscarriage is equal.**

| Year    | Pregnancies<br>(live births +<br>stillbirth +<br>abortions) | Conceptions if 10%, 20%, 25% or 33% result in miscarriage |          |          |                   |          |          |          |                   |          |          |          |                   |          |          |          |                   |
|---------|-------------------------------------------------------------|-----------------------------------------------------------|----------|----------|-------------------|----------|----------|----------|-------------------|----------|----------|----------|-------------------|----------|----------|----------|-------------------|
|         |                                                             | 10%                                                       |          |          |                   | 20%      |          |          |                   | 25%      |          |          |                   | 33%      |          |          |                   |
|         |                                                             | Total                                                     | Female   | Male     | PSR (%<br>female) | Total    | Female   | Male     | PSR (%<br>female) | Total    | Female   | Male     | PSR (%<br>female) | Total    | Female   | Male     | PSR (%<br>female) |
| 1993    | 835168                                                      | 927964                                                    | 460881   | 467084   | 49.67             | 1043960  | 518879   | 525082   | 49.70             | 1113557  | 553677   | 559880   | 49.72             | 1246519  | 620158   | 626361   | 49.75             |
| 1994    | 825078                                                      | 916753                                                    | 455385   | 461368   | 49.67             | 1031348  | 512682   | 518665   | 49.71             | 1100104  | 547060   | 553044   | 49.73             | 1231460  | 612738   | 618722   | 49.76             |
| 1995    | 806053                                                      | 895614                                                    | 445630   | 449984   | 49.76             | 1007566  | 501606   | 505960   | 49.78             | 1074737  | 535192   | 539546   | 49.80             | 1203064  | 599355   | 603709   | 49.82             |
| 1996    | 820940                                                      | 912156                                                    | 453778   | 458378   | 49.75             | 1026175  | 510788   | 515387   | 49.78             | 1094587  | 544994   | 549593   | 49.79             | 1225284  | 610342   | 614942   | 49.81             |
| 1997    | 815677                                                      | 906308                                                    | 451706   | 454601   | 49.84             | 1019596  | 508351   | 511246   | 49.86             | 1087569  | 542337   | 545232   | 49.87             | 1217428  | 607267   | 610162   | 49.88             |
| 1998    | 817189                                                      | 907988                                                    | 452867   | 455121   | 49.88             | 1021486  | 509616   | 511870   | 49.89             | 1089585  | 543666   | 545920   | 49.90             | 1219685  | 608716   | 610969   | 49.91             |
| 1999    | 798878                                                      | 887642                                                    | 442211   | 445431   | 49.82             | 998598   | 497688   | 500909   | 49.84             | 1065171  | 530975   | 534196   | 49.85             | 1192355  | 594567   | 597788   | 49.86             |
| 2000    | 783186                                                      | 870207                                                    | 434283   | 435924   | 49.91             | 978983   | 488671   | 490312   | 49.92             | 1044248  | 521304   | 522944   | 49.92             | 1168934  | 583647   | 585287   | 49.93             |
| 2001    | 774157                                                      | 860174                                                    | 429292   | 430882   | 49.91             | 967696   | 483053   | 484643   | 49.92             | 1032209  | 515310   | 516899   | 49.92             | 1155458  | 576934   | 578524   | 49.93             |
| 2002    | 775426                                                      | 861584                                                    | 429246   | 432339   | 49.82             | 969283   | 483095   | 486188   | 49.84             | 1033901  | 515404   | 518497   | 49.85             | 1157352  | 577130   | 580223   | 49.87             |
| 2003    | 806636                                                      | 896262                                                    | 447122   | 449140   | 49.89             | 1008295  | 503138   | 505157   | 49.90             | 1075515  | 536748   | 538767   | 49.91             | 1203934  | 600958   | 602976   | 49.92             |
| 2004    | 828822                                                      | 920913                                                    | 458852   | 462061   | 49.83             | 1036028  | 516409   | 519618   | 49.85             | 1105096  | 550944   | 554152   | 49.85             | 1237048  | 616920   | 620128   | 49.87             |
| 2005    | 835734                                                      | 928593                                                    | 463887   | 464706   | 49.96             | 1044668  | 521924   | 522743   | 49.96             | 1114312  | 556746   | 557566   | 49.96             | 1247364  | 623272   | 624092   | 49.97             |
| 2006    | 866940                                                      | 963267                                                    | 481545   | 481721   | 49.99             | 1083675  | 541749   | 541926   | 49.99             | 1155920  | 577872   | 578048   | 49.99             | 1293940  | 646882   | 647058   | 49.99             |
| 2007    | 892110                                                      | 991233                                                    | 493916   | 497317   | 49.83             | 1115138  | 555869   | 559269   | 49.85             | 1189480  | 593040   | 596440   | 49.86             | 1331507  | 664053   | 667454   | 49.87             |
| 2008    | 907624                                                      | 1008471                                                   | 503407   | 505064   | 49.92             | 1134530  | 566437   | 568093   | 49.93             | 1210165  | 604254   | 605911   | 49.93             | 1354663  | 676503   | 678160   | 49.94             |
| 2009    | 899036                                                      | 998929                                                    | 498903   | 500025   | 49.94             | 1123795  | 561336   | 562459   | 49.95             | 1198715  | 598796   | 599918   | 49.95             | 1341845  | 670361   | 671483   | 49.96             |
| 2010    | 916453                                                      | 1018281                                                   | 507440   | 510841   | 49.83             | 1145566  | 571082   | 574484   | 49.85             | 1221937  | 609268   | 612669   | 49.86             | 1367840  | 682219   | 685621   | 49.88             |
| 2011    | 917655                                                      | 1019617                                                   | 508497   | 511119   | 49.87             | 1147069  | 572223   | 574845   | 49.89             | 1223540  | 610459   | 613081   | 49.89             | 1369634  | 683506   | 686128   | 49.90             |
| 2012    | 918354                                                      | 1020393                                                   | 508171   | 512222   | 49.80             | 1147943  | 571946   | 575997   | 49.82             | 1224472  | 610211   | 614261   | 49.83             | 1370678  | 683314   | 687364   | 49.85             |
| 2013    | 887127                                                      | 985697                                                    | 491339   | 494357   | 49.85             | 1108909  | 552945   | 555963   | 49.86             | 1182836  | 589909   | 592927   | 49.87             | 1324070  | 660526   | 663544   | 49.89             |
| 2014    | 883058                                                      | 981176                                                    | 489120   | 492055   | 49.85             | 1103823  | 550444   | 553379   | 49.87             | 1177411  | 587238   | 590173   | 49.88             | 1317997  | 657531   | 660466   | 49.89             |
| 2015    | 886823                                                      | 985359                                                    | 491131   | 494228   | 49.84             | 1108529  | 552716   | 555813   | 49.86             | 1182431  | 589667   | 592764   | 49.87             | 1323616  | 660260   | 663357   | 49.88             |
| 2016    | 884979                                                      | 983310                                                    | 490451   | 492859   | 49.88             | 1106224  | 551908   | 554316   | 49.89             | 1179972  | 588782   | 591190   | 49.90             | 1320864  | 659228   | 661636   | 49.91             |
| 2017    | 871838                                                      | 968709                                                    | 483305   | 485404   | 49.89             | 1089798  | 543849   | 545948   | 49.90             | 1162451  | 580176   | 582275   | 49.91             | 1301251  | 649576   | 651675   | 49.92             |
| Totals: | 21254941                                                    | 23616601                                                  | 11772368 | 11844233 | Av =<br>49.85     | 26568676 | 13248405 | 13320271 | Av =<br>49.86     | 28339921 | 14134028 | 14205893 | Av =<br>49.87     | 31723793 | 15825964 | 15897829 | Av =<br>49.89     |

**Table S5. The predicted primary (conception) sex ratio required to remove the female bias in miscarriage in England and Wales 1993-2017, determined as the sum of live births, stillbirths and abortions, and assuming that 10%, 20%, 25% or 33% of all conceptions result in miscarriage. Abortus sex is calculated from the total number of abortions on the assumption that the abortus sex ratio is equal equal (i.e. an abortus has an equal probability of being male or female, irrespective of when the abortion occurred). If 49.09% and 49.32% of conceptions are female, the proportion of males and females subsequently lost to miscarriage is equal.**

| Year    | Pregnancies<br>(live births +<br>stillbirth +<br>abortions) | Conceptions if 10%, 20%, 25% or 33% result in miscarriage |          |          |                      |          |          |          |                      |          |          |          |                      |          |          |          |                      |
|---------|-------------------------------------------------------------|-----------------------------------------------------------|----------|----------|----------------------|----------|----------|----------|----------------------|----------|----------|----------|----------------------|----------|----------|----------|----------------------|
|         |                                                             | 10%                                                       |          |          |                      | 20%      |          |          |                      | 25%      |          |          |                      | 33%      |          |          |                      |
|         |                                                             | Total                                                     | Female   | Male     | PSR<br>(%<br>female) | Total    | Female   | Male     | PSR<br>(%<br>female) | Total    | Female   | Male     | PSR<br>(%<br>female) | Total    | Female   | Male     | PSR<br>(%<br>female) |
| 1993    | 835168                                                      | 927964                                                    | 454732   | 473232   | 49.00                | 1043960  | 512730   | 531230   | 49.11                | 1113557  | 547529   | 566029   | 49.17                | 1246519  | 614010   | 632510   | 49.26                |
| 1994    | 825078                                                      | 916753                                                    | 449291   | 467462   | 49.01                | 1031348  | 506588   | 524759   | 49.12                | 1100104  | 540967   | 559138   | 49.17                | 1231460  | 606644   | 624815   | 49.26                |
| 1995    | 806053                                                      | 895614                                                    | 439576   | 456038   | 49.08                | 1007566  | 495552   | 512014   | 49.18                | 1074737  | 529138   | 545600   | 49.23                | 1203064  | 593301   | 609763   | 49.32                |
| 1996    | 820940                                                      | 912156                                                    | 447292   | 464864   | 49.04                | 1026175  | 504302   | 521874   | 49.14                | 1094587  | 538507   | 556079   | 49.20                | 1225284  | 603856   | 621428   | 49.28                |
| 1997    | 815677                                                      | 906308                                                    | 445047   | 461261   | 49.11                | 1019596  | 501691   | 517905   | 49.20                | 1087569  | 535678   | 551892   | 49.25                | 1217428  | 600607   | 616821   | 49.33                |
| 1998    | 817189                                                      | 907988                                                    | 445928   | 462060   | 49.11                | 1021486  | 502677   | 518809   | 49.21                | 1089585  | 536727   | 552859   | 49.26                | 1219685  | 601777   | 617909   | 49.34                |
| 1999    | 798878                                                      | 887642                                                    | 435428   | 452215   | 49.05                | 998598   | 490905   | 507692   | 49.16                | 1065171  | 524192   | 540979   | 49.21                | 1192355  | 587784   | 604571   | 49.30                |
| 2000    | 783186                                                      | 870207                                                    | 427569   | 442637   | 49.13                | 978983   | 481957   | 497025   | 49.23                | 1044248  | 514590   | 529658   | 49.28                | 1168934  | 576933   | 592001   | 49.36                |
| 2001    | 774157                                                      | 860174                                                    | 422624   | 437551   | 49.13                | 967696   | 476385   | 491312   | 49.23                | 1032209  | 508641   | 523568   | 49.28                | 1155458  | 570266   | 585193   | 49.35                |
| 2002    | 775426                                                      | 861584                                                    | 422669   | 438915   | 49.06                | 969283   | 476518   | 492764   | 49.16                | 1033901  | 508828   | 525074   | 49.21                | 1157352  | 570553   | 586799   | 49.30                |
| 2003    | 806636                                                      | 896262                                                    | 440356   | 455906   | 49.13                | 1008295  | 496373   | 511923   | 49.23                | 1075515  | 529982   | 545532   | 49.28                | 1203934  | 594192   | 609742   | 49.35                |
| 2004    | 828822                                                      | 920913                                                    | 451870   | 469043   | 49.07                | 1036028  | 509427   | 526600   | 49.17                | 1105096  | 543962   | 561135   | 49.22                | 1237048  | 609937   | 627110   | 49.31                |
| 2005    | 835734                                                      | 928593                                                    | 456560   | 472034   | 49.17                | 1044668  | 514597   | 530071   | 49.26                | 1114312  | 549419   | 564893   | 49.31                | 1247364  | 615945   | 631419   | 49.38                |
| 2006    | 866940                                                      | 963267                                                    | 473945   | 489322   | 49.20                | 1083675  | 534149   | 549526   | 49.29                | 1155920  | 570272   | 585649   | 49.33                | 1293940  | 639282   | 654659   | 49.41                |
| 2007    | 892110                                                      | 991233                                                    | 486027   | 505206   | 49.03                | 1115138  | 547979   | 567158   | 49.14                | 1189480  | 585151   | 604330   | 49.19                | 1331507  | 656164   | 675343   | 49.28                |
| 2008    | 907624                                                      | 1008471                                                   | 495542   | 512930   | 49.14                | 1134530  | 558571   | 575959   | 49.23                | 1210165  | 596389   | 613777   | 49.28                | 1354663  | 668637   | 686025   | 49.36                |
| 2009    | 899036                                                      | 998929                                                    | 490339   | 508589   | 49.09                | 1123795  | 552773   | 571023   | 49.19                | 1198715  | 590232   | 608482   | 49.24                | 1341845  | 661797   | 680047   | 49.32                |
| 2010    | 916453                                                      | 1018281                                                   | 499645   | 518636   | 49.07                | 1145566  | 563288   | 582279   | 49.17                | 1221937  | 601473   | 620464   | 49.22                | 1367840  | 674425   | 693416   | 49.31                |
| 2011    | 917655                                                      | 1019617                                                   | 500676   | 518940   | 49.10                | 1147069  | 564402   | 582666   | 49.20                | 1223540  | 602638   | 620902   | 49.25                | 1369634  | 675685   | 693949   | 49.33                |
| 2012    | 918354                                                      | 1020393                                                   | 500583   | 519811   | 49.06                | 1147943  | 564357   | 583585   | 49.16                | 1224472  | 602622   | 621850   | 49.21                | 1370678  | 675725   | 694953   | 49.30                |
| 2013    | 887127                                                      | 985697                                                    | 483644   | 502052   | 49.07                | 1108909  | 545250   | 563658   | 49.17                | 1182836  | 582214   | 600622   | 49.22                | 1324070  | 652831   | 671239   | 49.30                |
| 2014    | 883058                                                      | 981176                                                    | 481407   | 499768   | 49.06                | 1103823  | 542731   | 561092   | 49.17                | 1177411  | 579525   | 597886   | 49.22                | 1317997  | 649818   | 668179   | 49.30                |
| 2015    | 886823                                                      | 985359                                                    | 483394   | 501965   | 49.06                | 1108529  | 544979   | 563550   | 49.16                | 1182431  | 581930   | 600501   | 49.21                | 1323616  | 652523   | 671094   | 49.30                |
| 2016    | 884979                                                      | 983310                                                    | 482749   | 500562   | 49.09                | 1106224  | 544205   | 562018   | 49.19                | 1179972  | 581080   | 598893   | 49.25                | 1320864  | 651526   | 669339   | 49.33                |
| 2017    | 871838                                                      | 968709                                                    | 475747   | 492962   | 49.11                | 1089798  | 536291   | 553506   | 49.21                | 1162451  | 572618   | 589833   | 49.26                | 1301251  | 642018   | 659233   | 49.34                |
| Totals: | 21254941                                                    | 23616601                                                  | 11592640 | 12023961 | Av =<br>49.09        | 26568676 | 13068678 | 13499999 | Av =<br>49.19        | 28339921 | 13954300 | 14385621 | Av =<br>49.24        | 31723793 | 15646236 | 16077557 | Av =<br>49.32        |

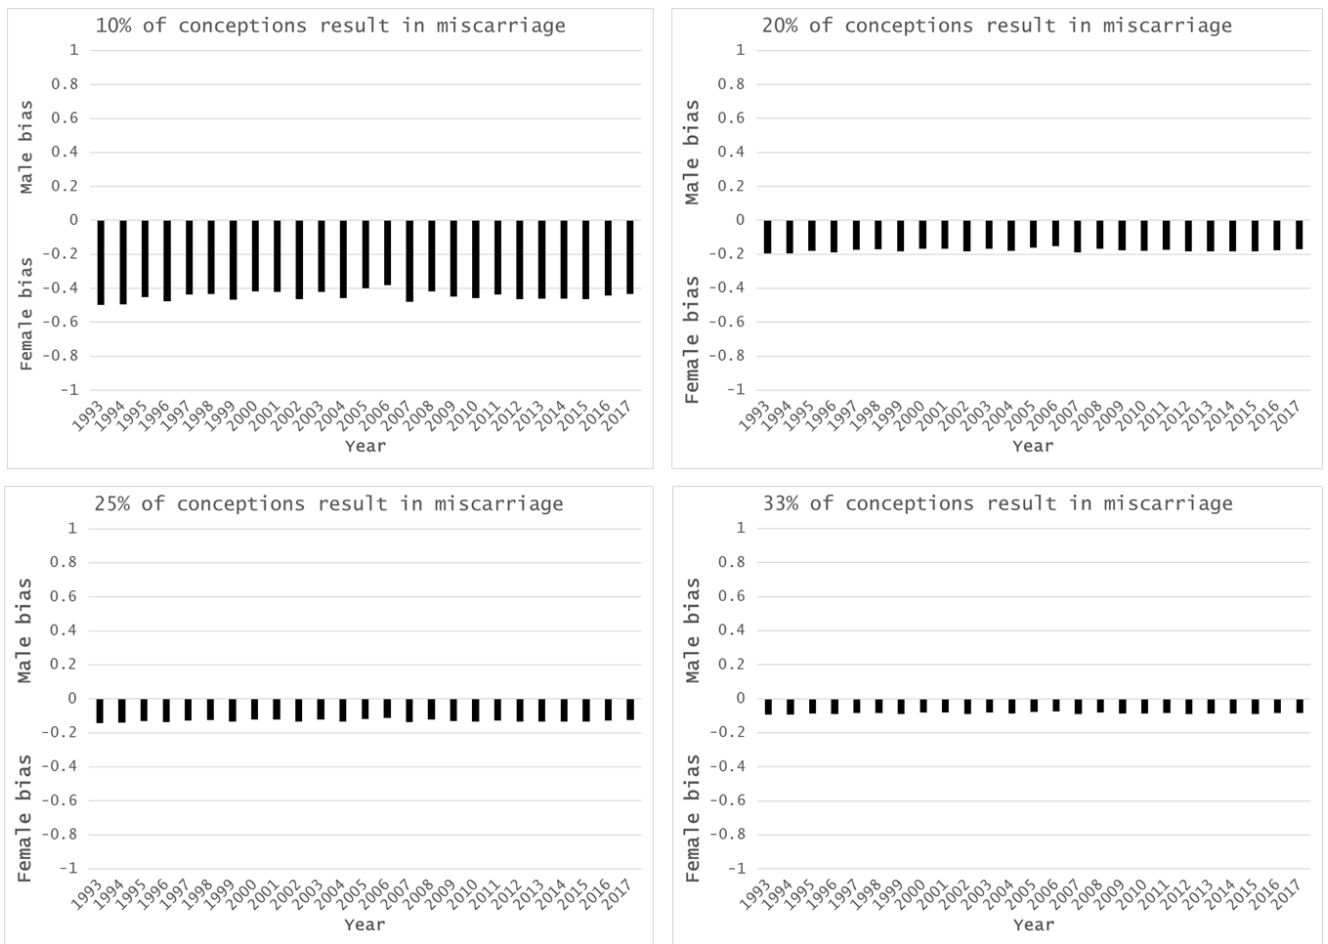

Figure S1. Relative miscarriage sex bias in England and Wales, 1993-2017, calculated as  $1-(\text{females miscarried}/\text{males miscarried})$ , calculated if 10%, 20%, 25% or 33% of all conceptions result in miscarriage and where abortus sex ratios are equal (i.e. an abortus has an equal probability of being male or female, irrespective of when the abortion occurred). A value of 0 would indicate no bias, a positive value would show male bias, and a negative values a female bias. In every year of this 25 year dataset, miscarriages are biased towards females, and to a greater extent than if abortions are female-biased  $\leq 12$  weeks and male-biased  $\geq 13$  weeks.
